# Supplementary material for: Transcriptomics analysis of salt stress tolerance in the roots of the mangrove Avicennia officinalis
Source: PubMed Central journal article supplement (PMC5577154; doi:10.1038/s41598-017-10730-2), 2017-08-30
Supplement: 41598_2017_10730_MOESM1_ESM.pdf [file 41598_2017_10730_MOESM1_ESM.pdf]

**Supplementary Information to:**

**Transcriptomics analysis of salt stress tolerance in the roots of the mangrove *Avicennia officinalis***

Pannaga Krishnamurthy<sup>1,2</sup>, Bijayalaxmi Mohanty<sup>3</sup>, Edward Wijaya<sup>4</sup>, Dong-Yup Lee<sup>3,5</sup>, Tit-Meng Lim<sup>1</sup>, Qingsong Lin<sup>1</sup>, Jian Xu<sup>1,6</sup>, Chiang-Shiong Loh<sup>1,2</sup> and Prakash P Kumar<sup>1,2\*</sup>

<sup>1</sup> Department of Biological Sciences, National University of Singapore, 14 Science Drive 4, Singapore 117543

<sup>2</sup> NUS Environmental Research Institute (NERI), National University of Singapore, #02-01, T-Lab Building, 5A Engineering Drive 1, Singapore 117411

<sup>3</sup> Department of Chemical and Biomolecular Engineering, National University of Singapore, 4 Engineering Drive 4, Singapore 117585

<sup>4</sup> Department of Genome Informatics, Research Institute for Microbial Diseases, Osaka University, Osaka 565-0781, Japan

<sup>5</sup> Bioprocessing Technology Institute, Agency for Science, Technology and Research (A\*STAR), 20 Biopolis Way, #06-01, Centros, Singapore 138668

<sup>6</sup> Centre for BioImaging Sciences, National University of Singapore, 14 Science Drive 4, Singapore 117557

\* Corresponding author

Address: Department of Biological Sciences, National University of Singapore, 14 Science Drive 4, Singapore 117543

Tel: +65-65162859

Fax: +65-67792486

email: [dbskumar@nus.edu.sg](mailto:dbskumar@nus.edu.sg)

## Supplemental Fig. S1

Length distribution of contigs and unigenes in *A. officinalis* root transcriptome. Transcriptome analysis was carried out from the roots of control and treated (500 mM NaCl for 24 h) seedling roots. Length distribution of contigs in control (a) and treated (b) transcriptomes with Nr annotations. Length distribution of unigenes in control (c) and treated (d) samples with Nr annotations. (e) All-unigene percentage annotations obtained with each source species using Nr database.

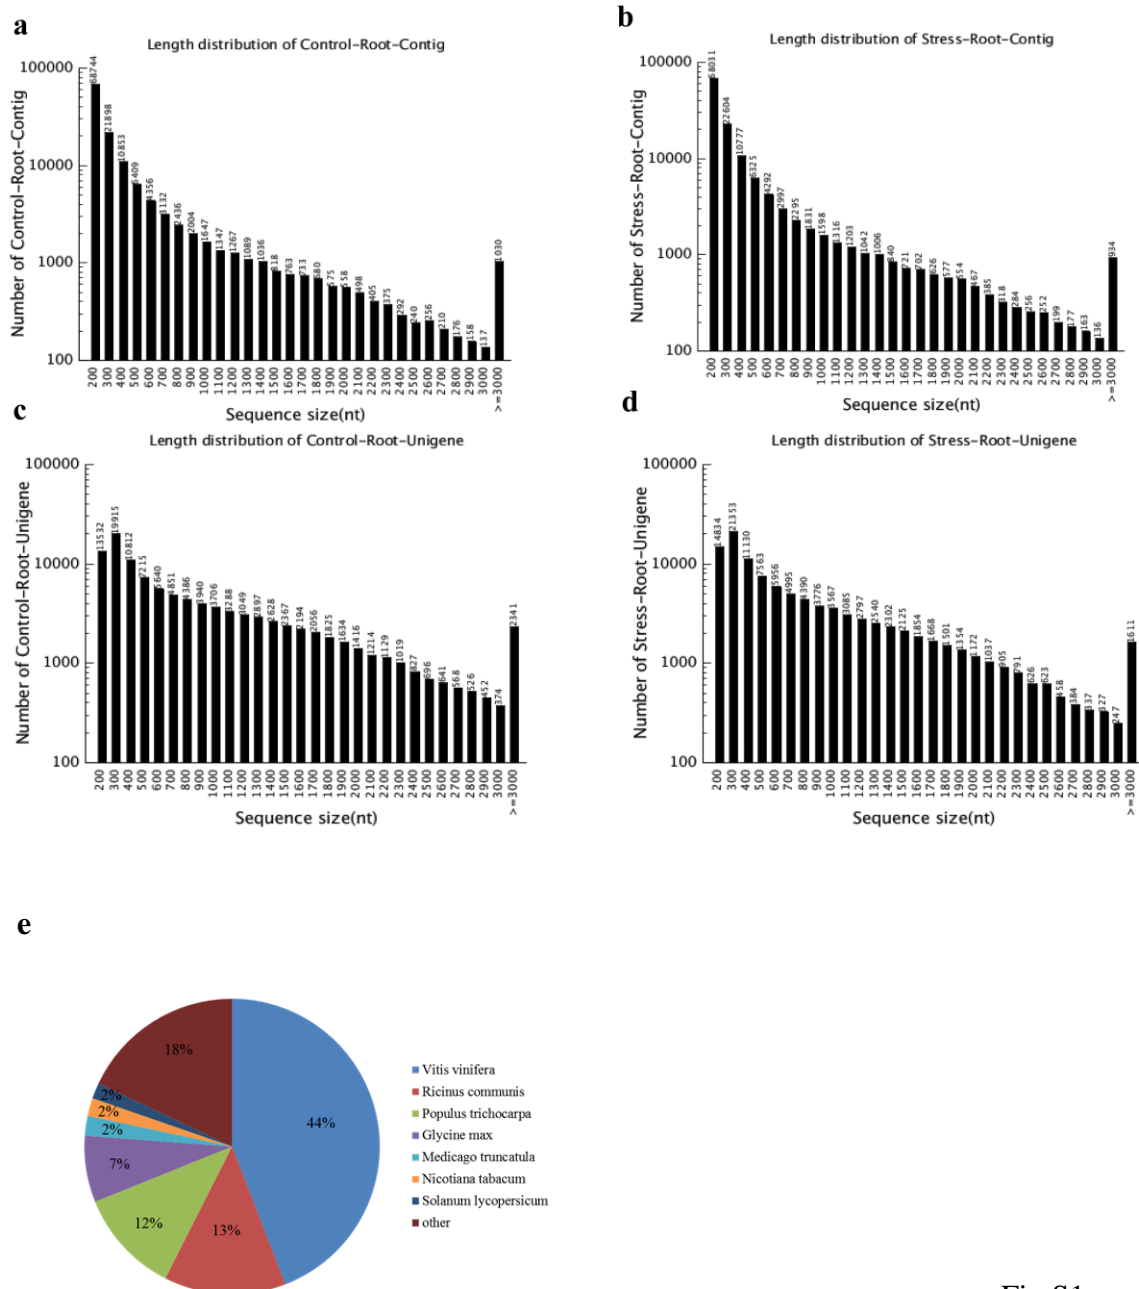

Fig S1

## Supplemental Fig. S2

**GO and COG classification of *A.officinalis* transcriptome:** (a) Go annotations for all-unigenes were obtained using Blast2GO program. 52,746 all-unigenes were grouped into three main GO categories; biological process, cellular component and molecular function as well as into 55 sub-categories. (b) COG classification obtained from all-unigenes: 27,436 unigenes showed homology to those in COG database and were functionally classified into 25 functional classes. Number of unigenes in a specific COG cluster are shown by Y-axis.

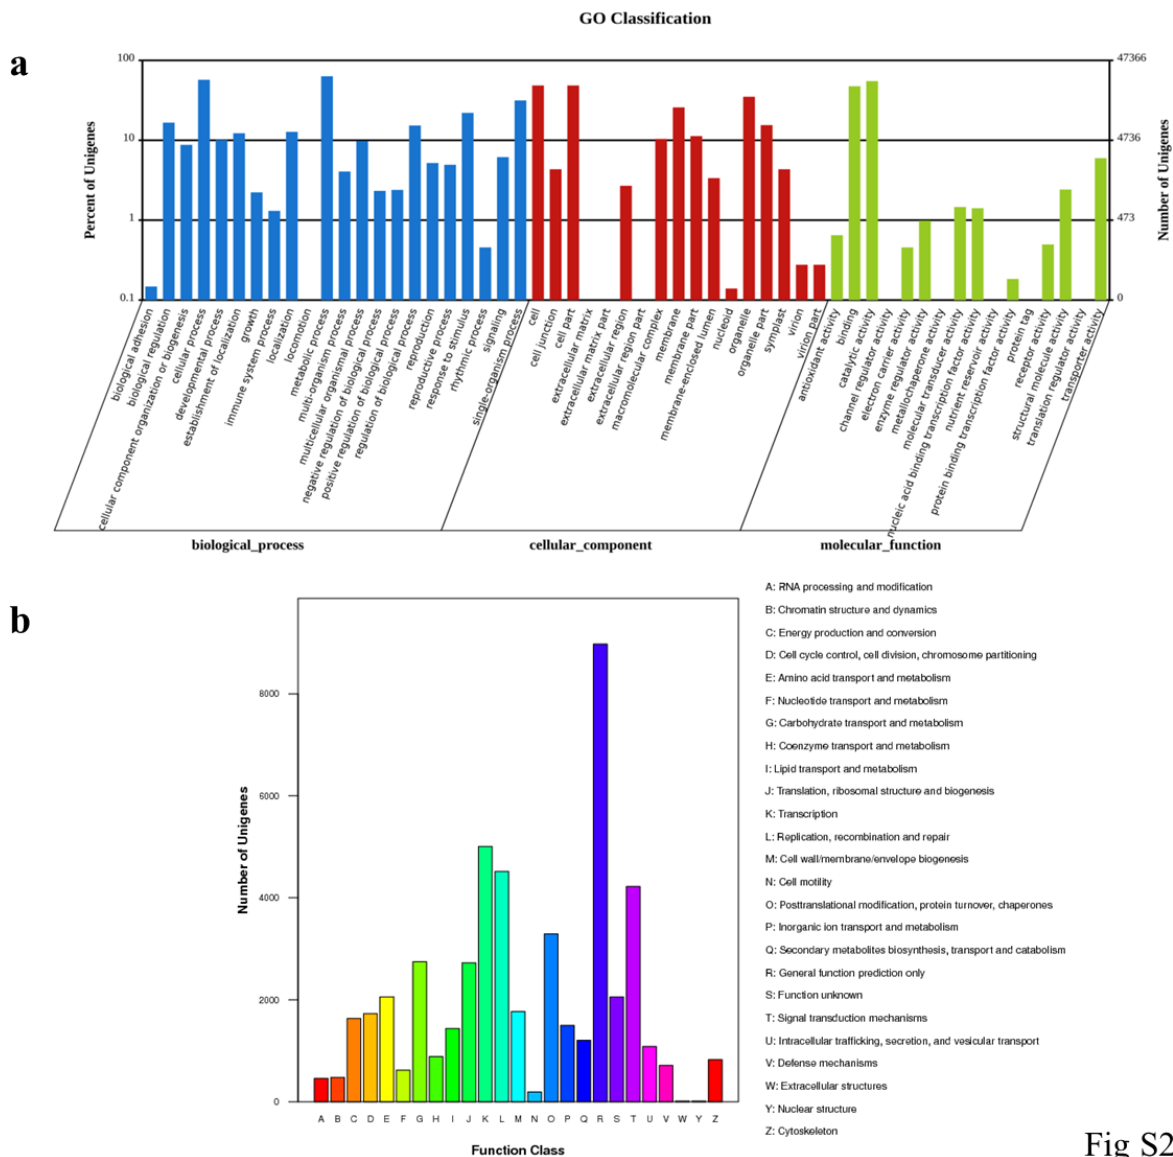

Fig S2

### Supplemental Fig. S3

**Expression pattern validation of selected DEGs by qRT-PCR.** Changes in expression profiles of selected genes as analyzed by qRT-PCR. (a) Up-regulated and (b) down-regulated unigenes with transcript abundance in treated roots (500 mM NaCl for 24h)  $\geq 2$ -fold compared to un-treated roots. (c) Variation in expression pattern from transcriptome data. Black bar indicates transcript abundance changes calculated by RPKM method. The grey bars plotted with error bars represent the relative expression levels quantified by qRT-PCR method. Relative expression levels of transcripts with reference to *Ubiquitin 10* transcript levels are plotted, qRT-PCR data represent means  $\pm$  SD, from 3 biological replicates. Ug, unigene.

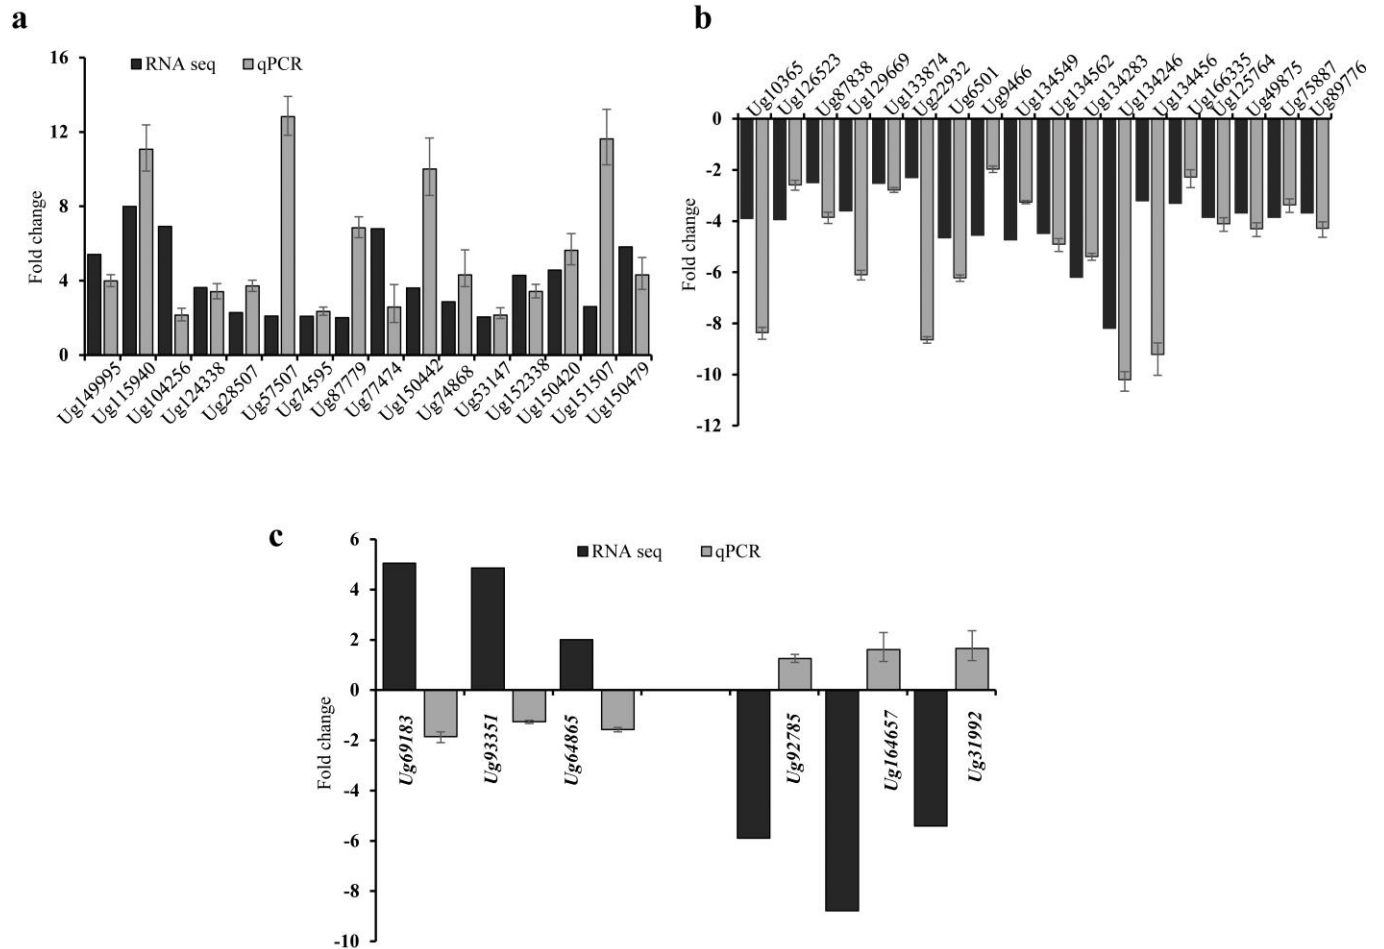

Fig S3

## Supplemental Fig. S4

**Temporal expression of selected DEGs:** Temporal changes in the transcript levels of DEGs related to ethylene-signaling. Expression of (a) *cationic peroxidase* (b) *ethylene response factors ERF1B* and *ERF114* (c) *Hexokinase* (d) *Trihelix* transcription factor and *S-Adenosyl methionine (SAM2)* were monitored by qRT-PCR in *A.officinalis* roots after 500 mM NaCl treatment for varying time periods. Relative expression levels of transcripts with reference to *Ubiquitin 10* transcript levels are plotted. Data represent means  $\pm$  SD from three biological replicates.

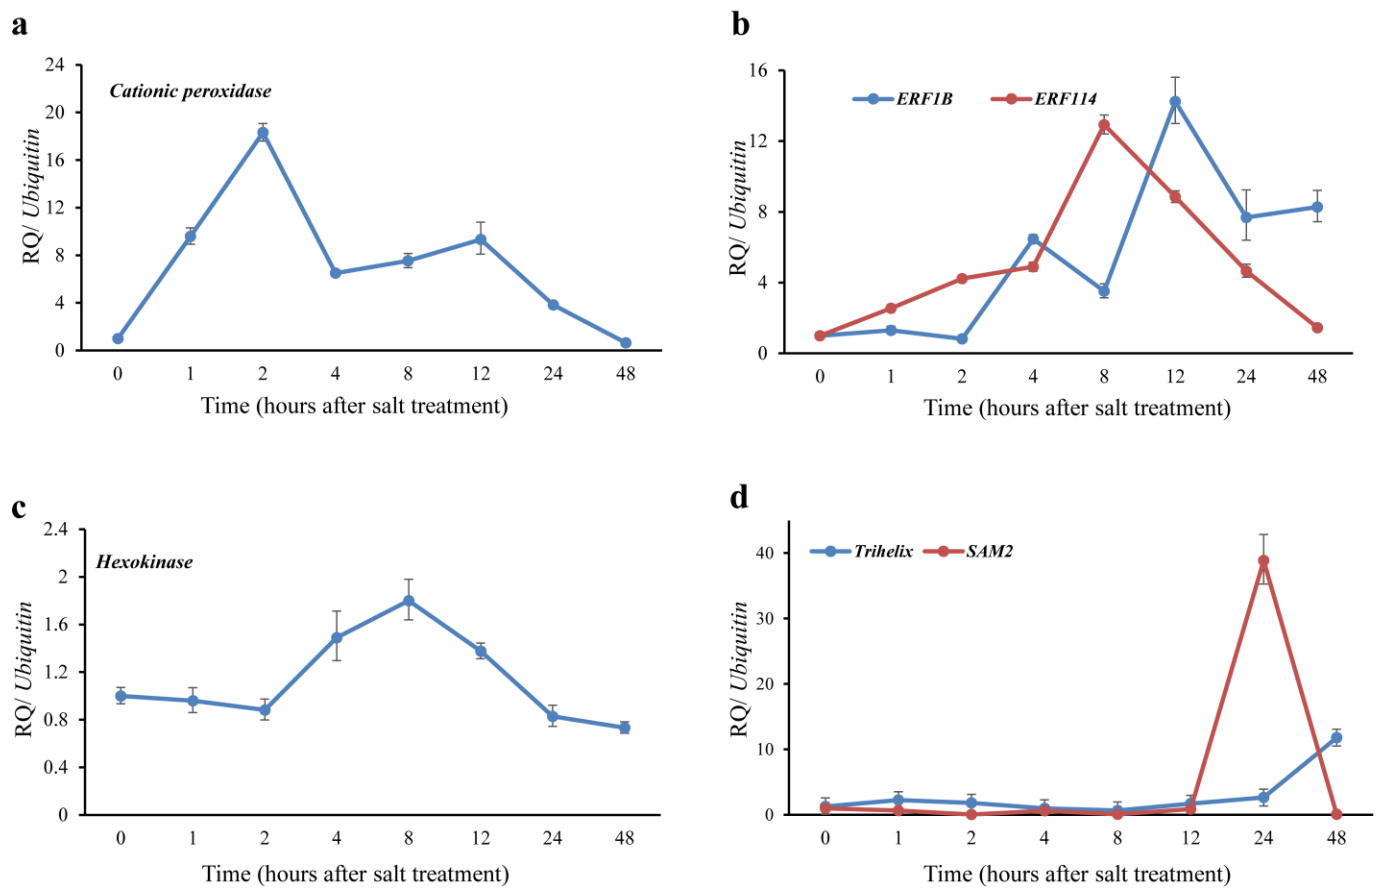

Fig S4

## Supplemental Fig. S5

**Temporal expression of selected DEGs:** Temporal changes in the transcript levels of DEGs related to (a) auxin-signaling and (b) Ca<sup>2+</sup>-signaling were monitored by qPCR in *A. officinalis* roots after 500 mM NaCl treatment for varying time periods. Relative expression levels of transcripts with reference to *Ubiquitin 10* transcript levels are plotted. Data represent means  $\pm$  SD from three biological replicates. *SKOR*: *Stelar K<sup>+</sup> outward rectifying channel*, *ARF*: *Auxin response factor*, *IAA11*: *Auxin-responsive protein11*, *PIN6*: *PIN-FORMED6*, *VHA-C*: *Vacuolar H<sup>+</sup>-ATPase subunit c*, *VPP*: *vacuolar H<sup>+</sup>-pyrophosphatase*, *CBL*: *calcineurin B-like protein*, *NHX*: *sodium hydrogen exchanger*, *CIPK*: *CBL-interacting serine / threonine-protein kinase*.

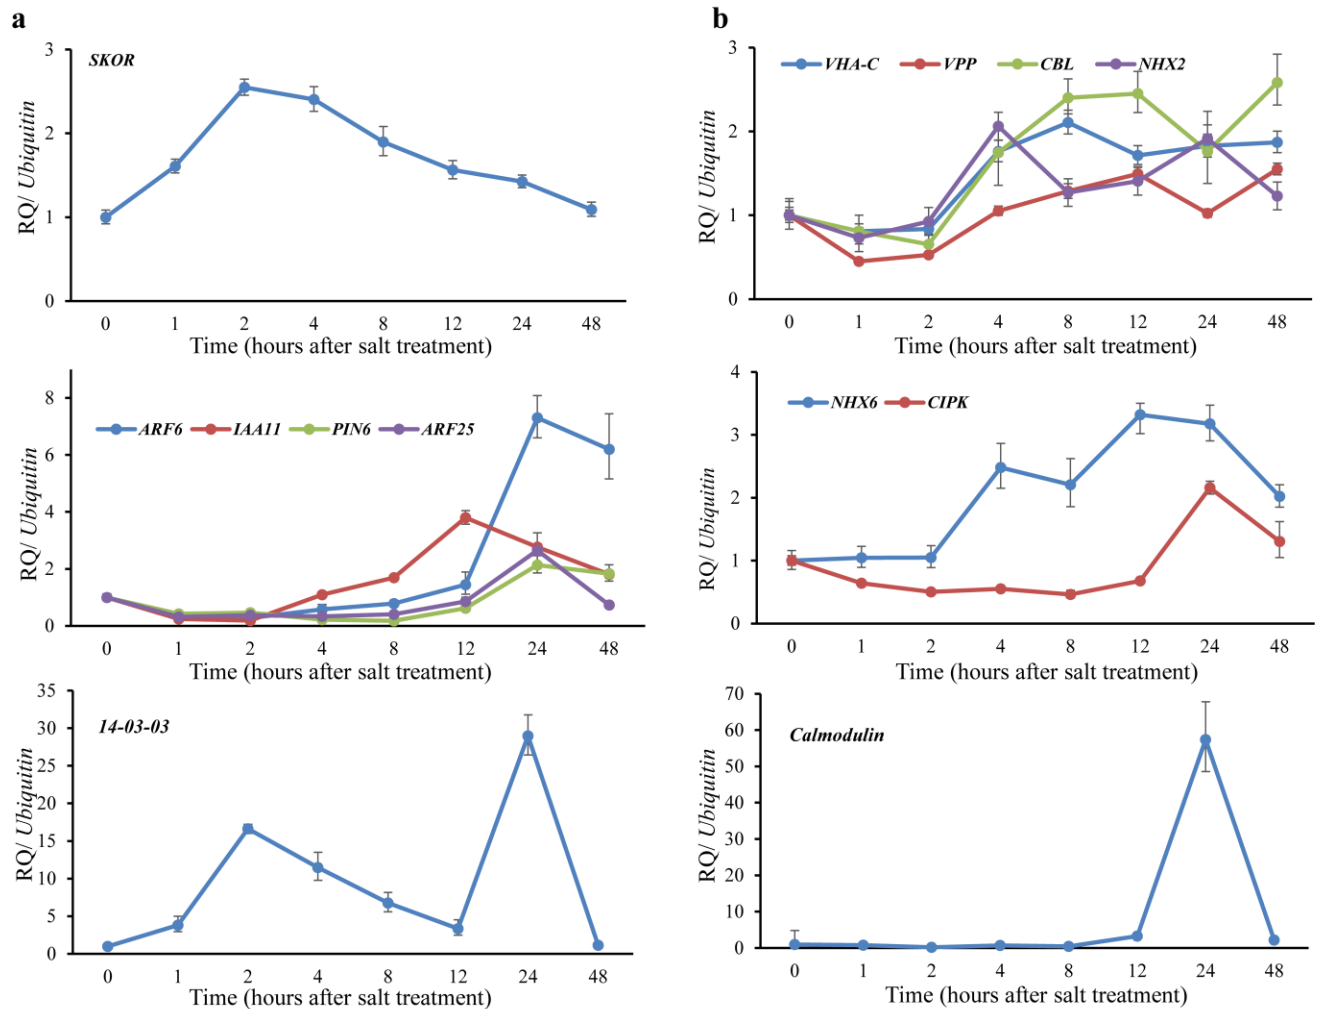

Fig S5

## Supplemental Table S1

KEGG pathway analysis: In total, 42,662 unigenes were assigned to 128 KEGG pathways, while 2628 DEGs were enriched in 122 pathways.

| No | Pathway                                     | DEGs with pathway annotation (2628) | All genes with pathway annotation (42662) | Pvalue   | Qvalue   | Pathway ID |
|----|---------------------------------------------|-------------------------------------|-------------------------------------------|----------|----------|------------|
| 1  | Metabolic pathways                          | 834 (31.74%)                        | 9390 (22.01%)                             | 9.08e-29 | 3.69e-27 | ko01100    |
| 2  | Biosynthesis of secondary metabolites       | 467 (17.77%)                        | 4578 (10.73%)                             | 2.34e-24 | 7.15e-23 | ko01110    |
| 3  | Ribosome                                    | 213 (8.11%)                         | 819 (1.92%)                               | 7.56e-70 | 9.23e-68 | ko03010    |
| 4  | RNA transport                               | 186 (7.08%)                         | 1308 (3.07%)                              | 6.82e-24 | 1.66e-22 | ko03013    |
| 5  | Endocytosis                                 | 134 (5.1%)                          | 979 (2.29%)                               | 1.41e-18 | 2.87e-17 | ko04144    |
| 6  | Spliceosome                                 | 119 (4.53%)                         | 1517 (3.56%)                              | 0.00342  | 1.13e-02 | ko03040    |
| 7  | Protein processing in endoplasmic reticulum | 104 (3.96%)                         | 1134 (2.66%)                              | 0.00020  | 8.52e-04 | ko04141    |
| 8  | Glycerophospholipid metabolism              | 102 (3.88%)                         | 1023 (2.4%)                               | 9.95e-08 | 8.09e-07 | ko00564    |
| 9  | Starch and sucrose metabolism               | 101 (3.84%)                         | 1126 (2.64%)                              | 8.86e-06 | 4.91e-05 | ko00500    |
| 10 | Glycolysis / Gluconeogenesis                | 94 (3.58%)                          | 584 (1.37%)                               | 9.09e-13 | 1.11e-11 | ko00010    |
| 11 | Ether lipid metabolism                      | 88 (3.35%)                          | 637 (1.49%)                               | 6.50e-14 | 8.81e-13 | ko00565    |
| 12 | mRNA surveillance pathway                   | 87 (3.31%)                          | 751 (1.76%)                               | 2.01e-07 | 1.36e-06 | ko03015    |
| 13 | Citrate cycle (TCA cycle)                   | 83 (3.16%)                          | 290 (0.68%)                               | 4.06e-30 | 2.47e-28 | ko00020    |
| 14 | Pentose and glucuronate interconversions    | 78 (2.97%)                          | 426 (1%)                                  | 1.67e-17 | 2.91e-16 | ko00040    |
| 15 | Oxidative phosphorylation                   | 74 (2.82%)                          | 553 (1.3%)                                | 1.25e-07 | 9.01e-07 | ko00190    |
| 16 | Plant-pathogen interaction                  | 72 (2.74%)                          | 2816 (6.6%)                               | 1.00     | 1.00e+00 | ko04626    |
| 17 | Pyruvate metabolism                         | 71 (2.7%)                           | 474 (1.11%)                               | 5.12e-10 | 5.67e-09 | ko00620    |
| 18 | Purine metabolism                           | 66 (2.51%)                          | 902 (2.11%)                               | 0.03633  | 9.04e-02 | ko00230    |
| 19 | Phagosome                                   | 65 (2.47%)                          | 436 (1.02%)                               | 2.47e-08 | 2.51e-07 | ko04145    |
| 20 | Amino sugar and nucleotide sugar metabolism | 56 (2.13%)                          | 607 (1.42%)                               | 0.00534  | 1.67e-02 | ko00520    |
| 21 | Plant hormone signal transduction           | 56 (2.13%)                          | 2613 (6.12%)                              | 1.00     | 1.00e+00 | ko04075    |
| 22 | Phenylpropanoid biosynthesis                | 53 (2.02%)                          | 630 (1.48%)                               | 0.02483  | 6.58e-02 | ko00940    |
| 23 | Fatty acid metabolism                       | 51 (1.94%)                          | 402 (0.94%)                               | 1.04e-05 | 5.50e-05 | ko00071    |
| 24 | Proteasome                                  | 50 (1.9%)                           | 188 (0.44%)                               | 1.92e-16 | 2.92e-15 | ko03050    |
| 25 | Valine, leucine and isoleucine degradation  | 47 (1.79%)                          | 333 (0.78%)                               | 4.36e-06 | 2.80e-05 | ko00280    |
| 26 | Glyoxylate and dicarboxylate metabolism     | 46 (1.75%)                          | 330 (0.77%)                               | 4.99e-08 | 4.69e-07 | ko00630    |
| 27 | Alanine, aspartate and glutamate metabolism | 45 (1.71%)                          | 270 (0.63%)                               | 8.49e-08 | 7.39e-07 | ko00250    |
| 28 | Pyrimidine metabolism                       | 45 (1.71%)                          | 838 (1.96%)                               | 0.61135  | 9.17e-01 | ko00240    |
| 29 | Peroxisome                                  | 43 (1.64%)                          | 481 (1.13%)                               | 0.12742  | 2.63e-01 | ko04146    |

|    |                                                     |            |             |          |          |         |
|----|-----------------------------------------------------|------------|-------------|----------|----------|---------|
| 30 | Propanoate metabolism                               | 42 (1.6%)  | 264 (0.62%) | 1.24e-07 | 9.01e-07 | ko00640 |
| 31 | Ribosome biogenesis in eukaryotes                   | 41 (1.56%) | 639 (1.5%)  | 0.70027  | 9.82e-01 | ko03008 |
| 32 | Arginine and proline metabolism                     | 40 (1.52%) | 328 (0.77%) | 0.00098  | 3.65e-03 | ko00330 |
| 33 | Cysteine and methionine metabolism                  | 39 (1.48%) | 295 (0.69%) | 0.00106  | 3.80e-03 | ko00270 |
| 34 | Carbon fixation in photosynthetic organisms         | 38 (1.45%) | 301 (0.71%) | 0.00056  | 2.19e-03 | ko00710 |
| 35 | Ubiquitin mediated proteolysis                      | 38 (1.45%) | 876 (2.05%) | 0.98864  | 1.00e+00 | ko04120 |
| 36 | Phenylalanine metabolism                            | 35 (1.33%) | 245 (0.57%) | 8.65e-06 | 4.91e-05 | ko00360 |
| 37 | RNA degradation                                     | 33 (1.26%) | 638 (1.5%)  | 0.92794  | 1.00e+00 | ko03018 |
| 38 | Ascorbate and aldarate metabolism                   | 30 (1.14%) | 243 (0.57%) | 0.00012  | 5.21e-04 | ko00053 |
| 39 | Fructose and mannose metabolism                     | 31 (1.18%) | 277 (0.65%) | 0.00303  | 1.03e-02 | ko00051 |
| 40 | Pentose phosphate pathway                           | 31 (1.18%) | 219 (0.51%) | 1.58e-05 | 8.02e-05 | ko00030 |
| 41 | Galactose metabolism                                | 31 (1.18%) | 398 (0.93%) | 0.07165  | 1.59e-01 | ko00052 |
| 42 | Glutathione metabolism                              | 29 (1.1%)  | 242 (0.57%) | 0.00096  | 3.65e-03 | ko00480 |
| 43 | beta-Alanine metabolism                             | 28 (1.07%) | 168 (0.39%) | 5.96e-06 | 3.63e-05 | ko00410 |
| 44 | Tryptophan metabolism                               | 28 (1.07%) | 201 (0.47%) | 2.26e-05 | 1.06e-04 | ko00380 |
| 45 | Tyrosine metabolism                                 | 28 (1.07%) | 265 (0.62%) | 0.00153  | 5.32e-03 | ko00350 |
| 46 | Butanoate metabolism                                | 27 (1.03%) | 228 (0.53%) | 0.00043  | 1.73e-03 | ko00650 |
| 47 | alpha-Linolenic acid metabolism                     | 27 (1.03%) | 234 (0.55%) | 0.06158  | 1.39e-01 | ko00592 |
| 48 | RNA polymerase                                      | 27 (1.03%) | 365 (0.86%) | 0.08527  | 1.81e-01 | ko03020 |
| 49 | Glycerolipid metabolism                             | 26 (0.99%) | 302 (0.71%) | 0.03497  | 8.88e-02 | ko00561 |
| 50 | Biosynthesis of unsaturated fatty acids             | 25 (0.95%) | 194 (0.45%) | 0.00365  | 1.17e-02 | ko01040 |
| 51 | Glycine, serine and threonine metabolism            | 24 (0.91%) | 242 (0.57%) | 0.18582  | 3.48e-01 | ko00260 |
| 52 | Valine, leucine and isoleucine biosynthesis         | 22 (0.84%) | 128 (0.3%)  | 1.70e-05 | 8.31e-05 | ko00290 |
| 53 | ABC transporters                                    | 22 (0.84%) | 589 (1.38%) | 0.99943  | 1.00e+00 | ko02010 |
| 54 | Limonene and pinene degradation                     | 21 (0.8%)  | 172 (0.4%)  | 0.02085  | 5.78e-02 | ko00903 |
| 55 | Nitrogen metabolism                                 | 21 (0.8%)  | 206 (0.48%) | 0.02837  | 7.36e-02 | ko00910 |
| 56 | Flavonoid biosynthesis                              | 21 (0.8%)  | 284 (0.67%) | 0.12981  | 2.64e-01 | ko00941 |
| 57 | Natural killer cell mediated cytotoxicity           | 20 (0.76%) | 258 (0.6%)  | 0.48767  | 8.04e-01 | ko04650 |
| 58 | Lysine degradation                                  | 19 (0.72%) | 186 (0.44%) | 0.01410  | 4.09e-02 | ko00310 |
| 59 | Carotenoid biosynthesis                             | 18 (0.68%) | 231 (0.54%) | 0.47815  | 7.99e-01 | ko00906 |
| 60 | Cyanoamino acid metabolism                          | 18 (0.68%) | 276 (0.65%) | 0.54652  | 8.77e-01 | ko00460 |
| 61 | Terpenoid backbone biosynthesis                     | 17 (0.65%) | 395 (0.93%) | 0.84134  | 1.00e+00 | ko00900 |
| 62 | Selenocompound metabolism                           | 16 (0.61%) | 71 (0.17%)  | 9.16e-05 | 4.14e-04 | ko00450 |
| 63 | Cutin, suberine and wax biosynthesis                | 15 (0.57%) | 156 (0.37%) | 0.05048  | 1.18e-01 | ko00073 |
| 64 | Phenylalanine, tyrosine and tryptophan biosynthesis | 15 (0.57%) | 184 (0.43%) | 0.16164  | 3.08e-01 | ko00400 |
| 65 | Aminoacyl-tRNA biosynthesis                         | 15 (0.57%) | 258 (0.6%)  | 0.52380  | 8.52e-01 | ko00970 |
| 66 | Phosphatidylinositol signaling system               | 15 (0.57%) | 496 (1.16%) | 0.99844  | 1.00e+00 | ko04070 |
| 67 | Fatty acid biosynthesis                             | 14 (0.53%) | 121 (0.28%) | 0.02029  | 5.76e-02 | ko00061 |
| 68 | Steroid biosynthesis                                | 13 (0.49%) | 180 (0.42%) | 0.47051  | 7.97e-01 | ko00100 |
| 69 | Basal transcription factors                         | 13 (0.49%) | 265 (0.62%) | 0.76221  | 1.00e+00 | ko03022 |
| 70 | Diterpenoid biosynthesis                            | 13 (0.49%) | 115 (0.27%) | 0.00746  | 2.27e-02 | ko00904 |
| 71 | Inositol phosphate metabolism                       | 13 (0.49%) | 373 (0.87%) | 0.97890  | 1.00e+00 | ko00562 |
| 72 | Sulfur metabolism                                   | 12 (0.46%) | 111 (0.26%) | 0.04168  | 1.02e-01 | ko00920 |
| 73 | Protein export                                      | 12 (0.46%) | 195 (0.46%) | 0.58637  | 9.07e-01 | ko03060 |



|     |                                                        |            |             |         |          |         |
|-----|--------------------------------------------------------|------------|-------------|---------|----------|---------|
| 74  | Sphingolipid metabolism                                | 12 (0.46%) | 231 (0.54%) | 0.79248 | 1.00e+00 | ko00600 |
| 75  | Nucleotide excision repair                             | 12 (0.46%) | 329 (0.77%) | 0.97530 | 1.00e+00 | ko03420 |
| 76  | Base excision repair                                   | 11 (0.42%) | 224 (0.53%) | 0.83168 | 1.00e+00 | ko03410 |
| 77  | Histidine metabolism                                   | 11 (0.42%) | 82 (0.19%)  | 0.05840 | 1.34e-01 | ko00340 |
| 78  | Pantothenate and CoA biosynthesis                      | 11 (0.42%) | 138 (0.32%) | 0.13445 | 2.69e-01 | ko00770 |
| 79  | Ubiquinone and other terpenoid-quinone biosynthesis    | 11 (0.42%) | 174 (0.41%) | 0.31299 | 5.57e-01 | ko00130 |
| 80  | Isoquinoline alkaloid biosynthesis                     | 10 (0.38%) | 85 (0.2%)   | 0.08397 | 1.81e-01 | ko00950 |
| 81  | SNARE interactions in vesicular transport              | 10 (0.38%) | 209 (0.49%) | 0.61739 | 9.17e-01 | ko04130 |
| 82  | Zeatin biosynthesis                                    | 10 (0.38%) | 210 (0.49%) | 0.58760 | 9.07e-01 | ko00908 |
| 83  | Regulation of autophagy                                | 10 (0.38%) | 278 (0.65%) | 0.97016 | 1.00e+00 | ko04140 |
| 84  | Stilbenoid, diarylheptanoid and gingerol biosynthesis  | 9 (0.34%)  | 228 (0.53%) | 0.89149 | 1.00e+00 | ko00945 |
| 85  | Vitamin B6 metabolism                                  | 8 (0.3%)   | 56 (0.13%)  | 0.01208 | 3.59e-02 | ko00750 |
| 86  | Circadian rhythm - mammal                              | 8 (0.3%)   | 86 (0.2%)   | 0.14806 | 2.87e-01 | ko04710 |
| 87  | Synthesis and degradation of ketone bodies             | 8 (0.3%)   | 132 (0.31%) | 0.30754 | 5.57e-01 | ko00072 |
| 88  | Porphyrin and chlorophyll metabolism                   | 8 (0.3%)   | 208 (0.49%) | 0.90906 | 1.00e+00 | ko00860 |
| 89  | Circadian rhythm - plant                               | 8 (0.3%)   | 431 (1.01%) | 0.99999 | 1.00e+00 | ko04712 |
| 90  | Nicotinate and nicotinamide metabolism                 | 7 (0.27%)  | 60 (0.14%)  | 0.08615 | 1.81e-01 | ko00760 |
| 91  | Tropane, piperidine and pyridine alkaloid biosynthesis | 7 (0.27%)  | 64 (0.15%)  | 0.25558 | 4.72e-01 | ko00960 |
| 92  | Fatty acid elongation                                  | 7 (0.27%)  | 100 (0.23%) | 0.56070 | 8.88e-01 | ko00062 |
| 93  | Other glycan degradation                               | 7 (0.27%)  | 214 (0.5%)  | 0.98897 | 1.00e+00 | ko00511 |
| 94  | Glycosphingolipid biosynthesis - globo series          | 6 (0.23%)  | 44 (0.1%)   | 0.04998 | 1.18e-01 | ko00603 |
| 95  | Linoleic acid metabolism                               | 6 (0.23%)  | 73 (0.17%)  | 0.87559 | 1.00e+00 | ko00591 |
| 96  | One carbon pool by folate                              | 6 (0.23%)  | 84 (0.2%)   | 0.35782 | 6.15e-01 | ko00670 |
| 97  | Homologous recombination                               | 6 (0.23%)  | 273 (0.64%) | 0.99419 | 1.00e+00 | ko03440 |
| 98  | N-Glycan biosynthesis                                  | 5 (0.19%)  | 288 (0.68%) | 0.99970 | 1.00e+00 | ko00510 |
| 99  | Taurine and hypotaurine metabolism                     | 4 (0.15%)  | 37 (0.09%)  | 0.31494 | 5.57e-01 | ko00430 |
| 100 | Riboflavin metabolism                                  | 4 (0.15%)  | 60 (0.14%)  | 0.63125 | 9.17e-01 | ko00740 |
| 101 | Flavone and flavonol biosynthesis                      | 4 (0.15%)  | 94 (0.22%)  | 0.68589 | 9.80e-01 | ko00944 |
| 102 | Glycosaminoglycan degradation                          | 4 (0.15%)  | 130 (0.3%)  | 0.96423 | 1.00e+00 | ko00531 |
| 103 | Biotin metabolism                                      | 3 (0.11%)  | 9 (0.02%)   | 0.02434 | 6.58e-02 | ko00780 |
| 104 | Arachidonic acid metabolism                            | 3 (0.11%)  | 47 (0.11%)  | 0.62976 | 9.17e-01 | ko00590 |
| 105 | C5-Branched dibasic acid metabolism                    | 3 (0.11%)  | 19 (0.04%)  | 0.14239 | 2.80e-01 | ko00660 |
| 106 | Brassinosteroid biosynthesis                           | 3 (0.11%)  | 121 (0.28%) | 0.87969 | 1.00e+00 | ko00905 |
| 107 | Sulfur relay system                                    | 3 (0.11%)  | 45 (0.11%)  | 0.60709 | 9.17e-01 | ko04122 |
| 108 | Lysine biosynthesis                                    | 3 (0.11%)  | 81 (0.19%)  | 0.99391 | 1.00e+00 | ko00300 |
| 109 | Mismatch repair                                        | 3 (0.11%)  | 173 (0.41%) | 0.99973 | 1.00e+00 | ko03430 |
| 110 | DNA replication                                        | 3 (0.11%)  | 228 (0.53%) | 0.99993 | 1.00e+00 | ko03030 |
| 111 | Glycosylphosphatidylinositol(GPI)-anchor biosynthesis  | 3 (0.11%)  | 238 (0.56%) | 0.99994 | 1.00e+00 | ko00563 |
| 112 | Benzoxazinoid biosynthesis                             | 2 (0.08%)  | 52 (0.12%)  | 0.69136 | 9.81e-01 | ko00402 |
| 113 | Glucosinolate biosynthesis                             | 2 (0.08%)  | 52 (0.12%)  | 0.74246 | 1.00e+00 | ko00966 |
| 114 | Glycosphingolipid biosynthesis - ganglio series        | 2 (0.08%)  | 83 (0.19%)  | 0.97101 | 1.00e+00 | ko00604 |

|     |                                               |           |             |         |          |         |
|-----|-----------------------------------------------|-----------|-------------|---------|----------|---------|
| 115 | Photosynthesis                                | 2 (0.08%) | 118 (0.28%) | 0.99678 | 1.00e+00 | ko00195 |
| 116 | Anthocyanin biosynthesis                      | 1 (0.04%) | 11 (0.03%)  | 0.35135 | 6.12e-01 | ko00942 |
| 117 | Photosynthesis - antenna proteins             | 1 (0.04%) | 29 (0.07%)  | 0.84121 | 1.00e+00 | ko00196 |
| 118 | Folate biosynthesis                           | 1 (0.04%) | 41 (0.1%)   | 0.91708 | 1.00e+00 | ko00790 |
| 119 | Thiamine metabolism                           | 1 (0.04%) | 46 (0.11%)  | 0.92823 | 1.00e+00 | ko00730 |
| 120 | Isoflavonoid biosynthesis                     | 1 (0.04%) | 51 (0.12%)  | 0.93078 | 1.00e+00 | ko00943 |
| 121 | Sesquiterpenoid and triterpenoid biosynthesis | 1 (0.04%) | 61 (0.14%)  | 0.98180 | 1.00e+00 | ko00909 |
| 122 | Non-homologous end-joining                    | 1 (0.04%) | 65 (0.15%)  | 0.98535 | 1.00e+00 | ko03450 |
| 123 | Other types of O-glycan biosynthesis          | --        | 55 (0.13%)  | --      | --       | ko00514 |
| 124 | Indole alkaloid biosynthesis                  | --        | 24 (0.06%)  | --      | --       | ko00901 |
| 125 | Monoterpenoid biosynthesis                    | --        | 21 (0.05%)  | --      | --       | ko00902 |
| 126 | Lipoic acid metabolism                        | --        | 18 (0.04%)  | --      | --       | ko00785 |
| 127 | Betalain biosynthesis                         | --        | 6 (0.01%)   | --      | --       | ko00965 |
| 128 | Caffeine metabolism                           | --        | 4 (0.01%)   | --      | --       | ko00232 |

**Table S2: List of differentially expressed transporters/channels**

| <b>GeneID</b>           | <b>Control_</b><br><b>Root_1,</b><br><b>Control_</b><br><b>Root_2</b><br><b>RPKM</b> | <b>Stress_Root</b><br><b>_1,Stress_R</b><br><b>oot_2</b><br><b>RPKM</b> | <b>log2Ratio(Stress</b><br><b>_Root_1,Stress_</b><br><b>Root_2/Control</b><br><b>_Root_1,Contro</b><br><b>l_Root_2)</b><br><b>normalize</b> | <b>p-value</b> | <b>Homologous</b><br><b>species</b> | <b>Swissprot-annotation</b>                                                              | <b>Up-Down-</b><br><b>Regulatio</b><br><b>n(Stress_</b><br><b>Root_1,Str</b><br><b>ess_Root_</b><br><b>2/Control_</b><br><b>Root_1,Co</b><br><b>ntrol_Roo</b><br><b>t_2)</b> |
|-------------------------|--------------------------------------------------------------------------------------|-------------------------------------------------------------------------|---------------------------------------------------------------------------------------------------------------------------------------------|----------------|-------------------------------------|------------------------------------------------------------------------------------------|------------------------------------------------------------------------------------------------------------------------------------------------------------------------------|
| <b>Ion transporters</b> |                                                                                      |                                                                         |                                                                                                                                             |                |                                     |                                                                                          |                                                                                                                                                                              |
| Unigene152563           | 1.2855                                                                               | 5.8442                                                                  | 2.008697229                                                                                                                                 | 3.35453E-05    | <i>P. trichocarpa</i>               | Phosphate transporter PHO1 homolog 1                                                     | up                                                                                                                                                                           |
| Unigene107038           | 0.00845                                                                              | 0.04135                                                                 | 2.290864083                                                                                                                                 | 0.04773992     | <i>P. trichocarpa</i>               | Potassium channel SKOR                                                                   | up                                                                                                                                                                           |
| Unigene82608            | 0.001                                                                                | 0.09615                                                                 | 6.587214952                                                                                                                                 | 0.01417369     | <i>V. vinifera</i>                  | Potassium transporter 13                                                                 | up                                                                                                                                                                           |
| Unigene251              | 0                                                                                    | 0.3797                                                                  | 5.219264215                                                                                                                                 | 9.3751E-06     | <i>R. communis</i>                  | Probable cyclic nucleotide-gated ion channel<br>20                                       | up                                                                                                                                                                           |
| Unigene35000            | 0                                                                                    | 0.5712                                                                  | 5.371267308                                                                                                                                 | 2.84275E-06    | <i>V. vinifera</i>                  | Probable peptide/nitrate transporter<br>At2g40460                                        | up                                                                                                                                                                           |
| Unigene150472           | 0.1812                                                                               | 5.4618                                                                  | 4.907320209                                                                                                                                 | 2.9248E-15     | <i>C. subellipsoidea</i>            | sodium-dependent inorganic phosphate<br>cotransporter                                    | up                                                                                                                                                                           |
| Unigene164554           | 0.001                                                                                | 0.12375                                                                 | 6.951284715                                                                                                                                 | 0.01413374     | <i>V. vinifera</i>                  | Cation/calcium exchanger 3 OS=Arabidopsis<br>thaliana                                    | up                                                                                                                                                                           |
| Unigene91704            | 0.001                                                                                | 0.04705                                                                 | 5.556122818                                                                                                                                 | 0.0147219      | <i>V. vinifera</i>                  | Vacuolar cation/proton exchanger 2                                                       | up                                                                                                                                                                           |
| Unigene84902            | 0.0694                                                                               | 0.6033                                                                  | 3.219264215                                                                                                                                 | 0.000110988    | <i>R. communis</i>                  | Magnesium transporter                                                                    | up                                                                                                                                                                           |
| Unigene73148            | 0.1473                                                                               | 0.7133                                                                  | 2.164816431                                                                                                                                 | 0.000176754    | <i>V. vinifera</i>                  | Molybdate transporter 1 MOT1                                                             | up                                                                                                                                                                           |
| Unigene30853            | 0.0614                                                                               | 1.0809                                                                  | 4.049339214                                                                                                                                 | 7.19668E-05    | <i>P. trichocarpa</i>               | Nitrate transporter                                                                      | up                                                                                                                                                                           |
| Unigene16087            | 0.1068                                                                               | 0.9455                                                                  | 2.956229809                                                                                                                                 | 1.61896E-06    | <i>S. tuberosum</i>                 | bile acid:Na <sup>+</sup> symporter, BASS family<br>Putative peptide/nitrate transporter | up                                                                                                                                                                           |
| Unigene25620            | 1.2064                                                                               | 5.1426                                                                  | 2.148874887                                                                                                                                 | 6.08046E-05    | <i>A. thaliana</i>                  | At2g38100                                                                                | up                                                                                                                                                                           |

|               |         |         |              |             |                          |                                                       |      |
|---------------|---------|---------|--------------|-------------|--------------------------|-------------------------------------------------------|------|
| Unigene51908  | 1.9328  | 4.9367  | 1.352854616  | 0.03710494  | <i>P. maritima</i>       | Sodium/hydrogen exchanger 2 NHX2                      | up   |
| Unigene115806 | 1.26635 | 3.21865 | 1.345779506  | 0.02027964  | <i>A. lyrata</i>         | Sodium/hydrogen exchanger 6NHX6                       | up   |
| Unigene18584  | 2.1834  | 0.2253  | -3.120585788 | 0.000179145 | <i>N. tabacum</i>        | Potassium channel KAT3 KAT3                           | down |
| Unigene18716  | 0.4676  | 0       | -4.758015709 | 0.000148525 | <i>V. vinifera</i>       | Potassium transporter 23 HAK23                        | down |
| Unigene137762 | 4.8067  | 0.42    | -3.535623287 | 5.07619E-06 | <i>G. max</i>            | Probable anion transporter 5 PHT4;5                   | down |
| Unigene62793  | 1.6122  | 0       | -5.038123628 | 2.47977E-05 | <i>N. tabacum</i>        | Probable potassium channel AKT5                       | down |
| Unigene130662 | 25.1943 | 1.0099  | -4.633234084 | 4.0321E-144 | <i>C. variabilis</i>     | Probable voltage-gated potassium channel subunit beta | down |
| Unigene130663 | 22.6262 | 0.8896  | -4.662735205 | 1.634E-112  | <i>B. distachyon</i>     | Probable voltage-gated potassium channel subunit beta | down |
| Unigene135654 | 3.512   | 0       | -5.1985883   | 7.69084E-06 | <i>S. moellendorffii</i> | Uncharacterized protein involved in cation transport  | down |
| Unigene134767 | 5.8469  | 0.5741  | -3.342978209 | 7.24766E-17 | <i>P. sojae</i>          | Vacuolar cation/proton exchanger 1a CAX1a             | down |
| Unigene133281 | 3.2554  | 0.3533  | -3.1985883   | 1.55914E-11 | <i>T. oceanica</i>       | Vacuolar cation/proton exchanger 2 CAX2               | down |
| Unigene126523 | 2.8779  | 0.5649  | -2.32917241  | 4.98453E-08 | <i>V. vinifera</i>       | Vacuolar cation/proton exchanger 3 CAX3               | down |
| Unigene134901 | 5.5253  | 0.7121  | -2.950660786 | 2.55146E-09 | <i>P. infestans</i>      | Vacuolar cation/proton exchanger 3 CAX3               | down |
| Unigene134902 | 8.5135  | 0.4083  | -4.376925541 | 2.47523E-20 | <i>Z. mays</i>           | Vacuolar cation/proton exchanger 4 CAX4               | down |
| Unigene138829 | 3.0972  | 0       | -4.857551382 | 8.13932E-05 | <i>M. truncatula</i>     | Vacuolar iron transporter 1 VIT1                      | down |
| Unigene135731 | 3.0512  | 0       | -5.272588881 | 4.30982E-06 | --                       | Ca <sup>2+</sup> /H <sup>+</sup> antiporter           | down |
| Unigene134016 | 3.5373  | 0       | -5.950660786 | 5.42407E-09 | --                       | Ca <sup>2+</sup> /H <sup>+</sup> antiporter           | down |
| Unigene69615  | 0.2514  | 0.10135 | -1.310638561 | 0.04087325  | <i>R. communis</i>       | Cation-chloride cotransporter 1CCC1                   | down |
| Unigene27252  | 0.10255 | 0.001   | -6.680183682 | 0.04862699  | <i>N. tabacum</i>        | Cyclic nucleotide-gated ion channel 1 CNGC1           | down |
| Unigene130311 | 2.2038  | 0       | -4.758015709 | 0.000148525 | <i>V. carteri</i>        | Mg <sup>2+</sup> and Co <sup>2+</sup> transporters    | down |

|                |         |         |              |             |                       |                                                                   |      |
|----------------|---------|---------|--------------|-------------|-----------------------|-------------------------------------------------------------------|------|
| Unigene102238  | 75.6421 | 4.6622  | -4.014402917 | 0           | <i>A. thaliana</i>    | Probable peptide/nitrate transporter<br>At1g72130                 | down |
| Unigene134419  | 5.7008  | 0       | -7.079943803 | 3.14887E-17 | <i>M. pusilla</i>     | Probable peptide/nitrate transporter<br>At3g43790                 | down |
| Unigene131825  | 5.6123  | 0       | -5.950660786 | 5.42407E-09 | --                    | High-affinity Fe <sup>2+</sup> /Pb <sup>2+</sup> permease         | down |
| Unigene134030  | 3.3815  | 0.1516  | -4.474222743 | 1.56486E-06 | <i>B. hominis</i>     | Metal tolerance protein 12 MTP12                                  | down |
| Unigene17669   | 0.4322  | 0.063   | -2.808641782 | 6.24054E-06 | <i>P. trichocarpa</i> | Metal tolerance protein C2                                        | down |
| Unigene62963   | 25.533  | 2.626   | -3.275414925 | 1.70947E-92 | <i>A. laibachii</i>   | Mitochondrial outer membrane protein porin<br>2 VDAC2             | down |
| Unigene75605   | 6.8156  | 1.2204  | -2.522912235 | 3.83365E-17 | <i>G. max</i>         | Nitrate transporter 1.2 NRT1.2                                    | down |
| Unigene124132  | 3.2163  | 0.588   | -2.410092405 | 2.84281E-20 | <i>P. trichocarpa</i> | Sulfate transporter 3.1 SULTR3;1                                  | down |
| Unigene135158  | 3.408   | 0.1673  | -4.342978209 | 1.15863E-10 | <i>Oryza sativa</i>   | HKT1                                                              | down |
| <b>ATPases</b> |         |         |              |             |                       |                                                                   |      |
| Unigene35552   | 0.8624  | 4.5383  | 2.551839554  | 1.46283E-28 | <i>V. vinifera</i>    | Calcium-transporting ATPase 12, plasma<br>membrane-type ACA12     | up   |
| Unigene115940  | 0.001   | 0.25455 | 7.991805255  | 0.006822052 | <i>M. truncatula</i>  | Calcium-transporting ATPase 2, plasma<br>membrane-type ACA2       | up   |
| Unigene150699  | 0.3569  | 5.8733  | 3.900195774  | 6.3372E-23  | <i>R. fluitans</i>    | Calcium-transporting ATPase 4, endoplasmic<br>reticulum-type ECA4 | up   |
| Unigene155730  | 0.001   | 0.5544  | 9.114783447  | 0.04636662  | <i>A. thaliana</i>    | V-type proton ATPase subunit B2 VHA-B2                            | up   |
| Unigene3470    | 0.001   | 0.12775 | 6.997179481  | 0.01416891  | <i>V. vinifera</i>    | V-type proton ATPase subunit C VHA-C                              | up   |
| Unigene88787   | 4.2021  | 27.5853 | 2.648376899  | 6.31043E-48 | <i>D. dichotoma</i>   | ATP synthase subunit 9, mitochondrial ATP9                        | up   |
| Unigene152275  | 0.8501  | 4.9601  | 2.312373619  | 1.12483E-07 | <i>Z. mays</i>        | ATP synthase subunit alpha, mitochondrial<br>ATPA                 | up   |
| Unigene150523  | 1.6718  | 8.9181  | 2.271731635  | 6.38215E-14 | <i>H. vulgare</i>     | ATP synthase subunit beta-3                                       | up   |
| Unigene152794  | 0.1392  | 3.2063  | 4.219264215  | 2.04539E-05 | <i>Z. mays</i>        | ATP synthase subunit O                                            | up   |
| Unigene29379   | 0.49575 | 1.23145 | 1.312673374  | 0.04816     | <i>V. radiata</i>     | Pyrophosphate-energized vacuolar membrane<br>proton pump          | up   |

|               |        |       |              |             |                        |                                                              |      |
|---------------|--------|-------|--------------|-------------|------------------------|--------------------------------------------------------------|------|
| Unigene152156 | 0.3294 | 4.794 | 3.856694136  | 2.32401E-07 | <i>G. theta</i>        | Soluble inorganic pyrophosphatase 1, PPA1                    | up   |
| Unigene134387 | 4.17   | 0.47  | -3.152294648 | 1.77E-09    | <i>V. vinifera</i>     | Phospholipid-transporting ATPase 10, ALA10                   | down |
| Unigene132087 | 3.93   | 0.16  | -4.651100505 | 2.63E-07    | <i>E. siliculosus</i>  | Phospholipid-transporting ATPase 2, ALA2                     | down |
| Unigene134685 | 3.11   | 0.24  | -3.705548289 | 8.49E-07    | <i>O. sativa</i>       | Phospholipid-transporting ATPase 6, ALA6                     | down |
| Unigene87855  | 41.12  | 3.12  | -3.716097759 | 0           | <i>S. lycopersicum</i> | Plasma membrane ATPase 1, PMA1                               | down |
| Unigene130898 | 10.86  | 1.10  | -3.29519031  | 3.13E-36    | <i>O. sativa</i>       | Probable calcium-transporting ATPase 5, plasma membrane-type | down |
| Unigene132768 | 2.42   | 0.34  | -2.825129904 | 7.91E-05    | <i>A. thaliana</i>     | Probable cation-transporting ATPase                          | down |
| Unigene135086 | 5.21   | 0.10  | -5.705548289 | 8.07E-27    | <i>P. sojae</i>        | Probable inorganic phosphate transporter 1-5, PHT1-5         | down |
| Unigene135087 | 12.40  | 1.08  | -3.515445405 | 6.98E-42    | <i>A. lyrata</i>       | Probable inorganic phosphate transporter 1-6, PHT1-6         | down |
| Unigene136395 | 2.48   | 0.00  | -4.758015709 | 0.000148525 | <i>O. sativa</i>       | Probable inorganic phosphate transporter 1-8, PHT1-8         | down |
| Unigene131458 | 2.64   | 0.13  | -4.342978209 | 5.19E-06    | <i>S. bicolor</i>      | Probable V-type proton ATPase subunit d                      | down |
| Unigene133821 | 4.36   | 0.00  | -5.808641782 | 2.76E-08    | <i>V. carteri</i>      | Probable V-type proton ATPase subunit H                      | down |
| Unigene11168  | 33.41  | 2.62  | -3.667651681 | 6.03E-155   | <i>M.truncatula</i>    | Soluble inorganic pyrophosphatase 1                          | down |
| Unigene133714 | 3.91   | 0.00  | -5.950660786 | 5.42E-09    | <i>P. patens</i>       | Vacuolar H <sup>+</sup> -ATPase V1 sector, subunit C         | down |
| Unigene131990 | 2.55   | 0.00  | -5.120585788 | 1.38E-05    | --                     | Vacuolar H <sup>+</sup> -ATPase V1 sector, subunit H         | down |
| Unigene131766 | 6.34   | 0.33  | -4.272588881 | 3.77E-10    | --                     | vacuolar-type H <sup>+</sup> -ATPase subunit E               | down |
| Unigene133043 | 3.35   | 0.17  | -4.272588881 | 9.47E-06    | --                     | V-type H <sup>+</sup> -transporting ATPase subunit E         | down |

|               |       |      |              |           |                          |                                                          |      |
|---------------|-------|------|--------------|-----------|--------------------------|----------------------------------------------------------|------|
| Unigene134998 | 8.26  | 1.21 | -2.768822463 | 5.39E-22  | <i>L. japonicus</i>      | V-type proton ATPase 16 kDa proteolipid subunit, VATP-P1 | down |
| Unigene132841 | 3.34  | 0.19 | -4.120585788 | 3.18E-05  | <i>T. oceanica</i>       | V-type proton ATPase catalytic subunit A (Fragment)      | down |
| Unigene134162 | 6.59  | 0.18 | -5.1985883   | 2.51E-10  | <i>C. subellipsoidea</i> | V-type proton ATPase catalytic subunit A isoform 1       | down |
| Unigene132840 | 5.38  | 0.36 | -3.881398124 | 5.51E-14  | <i>H. vulgare</i>        | V-type proton ATPase catalytic subunit A                 | down |
| Unigene129698 | 4.51  | 0.13 | -5.140485345 | 1.98E-18  | <i>G. hirsutum</i>       | V-type proton ATPase subunit B 1                         | down |
| Unigene126678 | 12.24 | 2.33 | -2.1985883   | 2.26E-19  | <i>G. hirsutum</i>       | V-type proton ATPase subunit B 2 (Fragment)              | down |
| Unigene130688 | 3.21  | 0.00 | -5.535623287 | 4.41E-07  | <i>V. carteri</i>        | V-type proton ATPase subunit B 2                         | down |
| Unigene22183  | 2.47  | 0.17 | -3.687626381 | 2.20E-09  | <i>M. crystallinum</i>   | V-type proton ATPase subunit B2, VHA-B2                  | down |
| Unigene136061 | 2.80  | 0.00 | -4.857551382 | 8.14E-05  | <i>C. subellipsoidea</i> | V-type proton ATPase subunit D, VHA-D                    | down |
| Unigene132829 | 3.96  | 0.21 | -4.1985883   | 1.73E-05  | <i>P. patens</i>         | V-type proton ATPase subunit F, VHA-F                    | down |
| Unigene134952 | 10.04 | 0.97 | -3.360051723 | 4.09E-17  | <i>H. vulgare</i>        | V-type proton ATPase subunit G1, VHA-G1                  | down |
| Unigene138460 | 17.97 | 2.34 | -2.950660786 | 2.94E-13  | <i>Chondrus crispus</i>  | ATP synthase subunit 9, mitochondrial, ATP9              | down |
| Unigene100890 | 29.43 | 2.36 | -3.637013867 | 1.40E-237 | <i>H. vulgare</i>        | ATP synthase subunit alpha, mitochondrial, ATPA          | down |
| Unigene23298  | 37.27 | 3.40 | -3.447805408 | 4.88E-267 | <i>H. vulgare</i>        | ATP synthase subunit beta-1, mitochondrial               | down |
| Unigene76853  | 14.85 | 1.39 | -3.410092405 | 4.41E-32  | <i>O. lucimarinus</i>    | ATP synthase subunit delta', mitochondrial               | down |
| Unigene135201 | 10.48 | 0.66 | -3.976195879 | 1.35E-48  | <i>H. vulgare</i>        | ATP synthase subunit gamma, mitochondrial, ATPC          | down |
| Unigene131726 | 6.97  | 0.47 | -3.881398124 | 2.07E-26  | <i>M. pusilla</i>        | Inorganic pyrophosphatase/exopolyphosphatase             | down |

|               |       |      |              |             |                         |                                                             |      |
|---------------|-------|------|--------------|-------------|-------------------------|-------------------------------------------------------------|------|
| Unigene135562 | 4.23  | 0.11 | -5.272588881 | 3.87E-20    | <i>P. patens</i>        | Cation-transporting ATPase CA1                              | down |
| Unigene135689 | 4.82  | 0.15 | -4.995054906 | 4.40E-09    | <i>S.moellendorffii</i> | Copper-transporting ATPase RAN1                             | down |
| Unigene144754 | 0.97  | 0.13 | -3.120585788 | 0.000179145 | <i>M. truncatula</i>    | Calcium-transporting ATPase 1, ACA1                         | down |
| Unigene135366 | 10.66 | 1.56 | -2.768284044 | 4.69E-23    | <i>P. sojae</i>         | Calcium-transporting ATPase 12, plasma membrane-type, ACA12 | down |
| Unigene135582 | 4.70  | 0.00 | -7.325700218 | 7.95E-20    | <i>R. fluitans</i>      | Calcium-transporting ATPase 4, ECA4                         | down |
| Unigene131018 | 6.14  | 0.52 | -3.555522845 | 2.24E-43    | <i>P. trichocarpa</i>   | Calcium-transporting ATPase 4, plasma membrane-type, ACA4   | down |
| Unigene132961 | 8.49  | 0.31 | -4.783550801 | 2.35E-27    | <i>M. polymorpha</i>    | Cation transport ATPase                                     | down |

**Sugar and osmolyte transporters**

|               |        |         |              |             |                      |                                                 |      |
|---------------|--------|---------|--------------|-------------|----------------------|-------------------------------------------------|------|
| Unigene13936  | 0.001  | 0.0646  | 6.01346226   | 0.01434315  | <i>S. demissum</i>   | Sucrose transport protein SUC3                  | up   |
| Unigene6107   | 0.0659 | 0.3908  | 2.271731635  | 6.09989E-05 | <i>O. europaea</i>   | Sugar carrier protein C, STC                    | up   |
| Unigene152267 | 0.3726 | 4.9925  | 3.634301714  | 9.31565E-09 | <i>H. vulgare</i>    | Sugar transport protein 11, STP11               | up   |
| Unigene150777 | 0      | 8.2926  | 7.258792579  | 1.70599E-18 | <i>H. vulgare</i>    | Sugar transport protein 8, STP8                 | up   |
| Unigene150178 | 0.6485 | 7.2812  | 3.482298621  | 4.5454E-12  | <i>H. vulgare</i>    | Sugar transport protein 9, STP9                 | up   |
| Unigene129526 | 1.4483 | 6.608   | 2.18319496   | 4.98346E-11 | <i>M. truncatula</i> | Probable inositol transporter 2, INT2           | up   |
| Unigene78096  | 0      | 0.4664  | 5.049339214  | 3.14848E-05 | <i>V. vinifera</i>   | Probable sugar phosphate/phosphate translocator | up   |
| Unigene124050 | 0.0534 | 0.4956  | 3.371267308  | 3.24208E-05 | <i>V. vinifera</i>   | Probable plastidic glucose transporter 2        | up   |
| Unigene151004 | 1.1596 | 5.1247  | 2.049339214  | 0.000170902 | <i>M. pusilla</i>    | Probable sugar phosphate/phosphate translocator | up   |
| Unigene68405  | 0.001  | 0.09515 | 6.572131751  | 0.01422354  | <i>R. communis</i>   | UDP-galactose transporter 1, UDP-GALT1          | up   |
| Unigene22561  | 0.2286 | 0.9248  | 2.164816431  | 0.000176754 | <i>V. vinifera</i>   | Bidirectional sugar transporter SWEET1b         | up   |
| Unigene133074 | 7.2245 | 0       | -7.520516395 | 3.75782E-22 | <i>P. patens</i>     | Fucose permease                                 | down |
| Unigene135688 | 3.2887 | 0       | -5.410092405 | 1.36931E-06 | <i>P. patens</i>     | Fucose permease                                 | down |



|                               |         |         |              |             |                          |                                                   |      |
|-------------------------------|---------|---------|--------------|-------------|--------------------------|---------------------------------------------------|------|
| Unigene133355                 | 1.9862  | 0       | -4.758015709 | 0.000148525 | <i>P. infestans</i>      | Glycerol uptake facilitator and related permeases | down |
| Unigene133988                 | 4.3775  | 0       | -6.038123628 | 1.85809E-09 | <i>H. vulgare</i>        | Inositol transporter 4, INT4                      | down |
| Unigene138409                 | 5.78    | 1.1093  | -2.209395055 | 2.05617E-09 | <i>V. vinifera</i>       | Monosaccharide-sensing protein 2, MSSP2           | down |
| Unigene130336                 | 14.1833 | 0.2575  | -5.778479811 | 1.6507E-133 | <i>P. trichocarpa</i>    | Probable inositol transporter 2, INT2             | down |
| Unigene135113                 | 6.1353  | 0.275   | -4.474222743 | 6.65305E-27 | <i>S. bicolor</i>        | Probable polyol transporter 3, PLT3               | down |
| Unigene128188                 | 9.1846  | 0.7777  | -3.556684903 | 4.17683E-41 | <i>M. domestica</i>      | Probable polyol transporter 6, PLT6               | down |
| Unigene135345                 | 16.1209 | 0.7203  | -4.479039759 | 1.98049E-67 | <i>M. truncatula</i>     | Probable sugar phosphate/phosphate translocator   | down |
| Unigene135346                 | 13.0094 | 0.4065  | -4.995054906 | 2.46731E-39 | <i>A. thaliana</i>       | Probable sugar phosphate/phosphate translocator   | down |
| Unigene133794                 | 4.3769  | 0.1003  | -5.442513883 | 4.86458E-12 | <i>E. siliculosus</i>    | GDP-fucose transporter                            | down |
| Unigene114741                 | 20.5643 | 1.9082  | -3.424591975 | 4.3399E-149 | <i>P. sitchensis</i>     | Sugar transport protein 10, STP10                 | down |
| Unigene127030                 | 29.2446 | 2.2135  | -3.717373724 | 8.2771E-194 | <i>H. vulgare</i>        | Sugar transport protein 11, STP11                 | down |
| Unigene89374                  | 28.7055 | 2.3825  | -3.585512163 | 4.4412E-215 | <i>P. sitchensis</i>     | Sugar transport protein 13, STP13                 | down |
| Unigene135097                 | 12.9101 | 1.193   | -3.426394217 | 1.32622E-34 | <i>A. lyrata</i>         | Sugar transport protein 2, STP2                   | down |
| Unigene63988                  | 23.9023 | 2.4745  | -3.26668828  | 1.8481E-174 | <i>A. lyrata</i>         | Sugar transport protein 4, STP4                   | down |
| Unigene10717                  | 28.6709 | 1.8588  | -3.941908312 | 9.4804E-203 | <i>P. sitchensis</i>     | Sugar transport protein 7, STP7                   | down |
| Unigene135774                 | 3.5098  | 0.6959  | -2.32917241  | 0.000115707 | <i>P. sojae</i>          | Sugar transport protein 9, STP9                   | down |
| Unigene52003                  | 11.5679 | 1.0895  | -3.403172991 | 4.54961E-78 | <i>G. max</i>            | H(+)/hexose cotransporter 3, HUP3                 | down |
| Unigene123418                 | 37.2275 | 5.7531  | -2.6049025   | 6.1197E-204 | <i>R. communis</i>       | Hexose carrier protein HEX6                       | down |
| Unigene32454                  | 0.7045  | 0.0336  | -4.120585788 | 3.17901E-05 | <i>R. communis</i>       | Probable polyamine transporter                    | down |
| <b>Carriers and permeases</b> |         |         |              |             |                          |                                                   |      |
| Unigene151569                 | 0.7235  | 7.3839  | 3.153675873  | 3.23352E-09 | <i>T. oceanica</i>       | Nucleoside permease                               | up   |
| Unigene150480                 | 1.9086  | 13.3117 | 2.578592282  | 1.2955E-38  | <i>C. subellipsoidea</i> | Permeases of the major facilitator superfamily    | up   |
| Unigene150929                 | 0.2168  | 5.9737  | 4.777259668  | 5.75269E-14 | <i>C. variabilis</i>     | Permeases of the major facilitator superfamily    | up   |

|                |         |          |              |             |                       |                                                                              |      |
|----------------|---------|----------|--------------|-------------|-----------------------|------------------------------------------------------------------------------|------|
| Unigene152024  | 0.27    | 5.3332   | 4.297266727  | 4.99539E-10 | --                    | Permeases of the major facilitator superfamily                               | up   |
| Unigene151505  | 0       | 5.9173   | 5.956229809  | 9.15877E-09 | --                    | Permeases of the major facilitator superfamily                               | up   |
| Unigene151730  | 0       | 6.5601   | 5.956229809  | 9.15877E-09 | --                    | Permeases of the major facilitator superfamily                               | up   |
| Unigene151451  | 0.3927  | 6.1242   | 3.956229809  | 6.77214E-08 | --                    | Permeases of the major facilitator superfamily                               | up   |
| Unigene152986  | 0       | 2.8686   | 5.136802055  | 1.71399E-05 | <i>P. infestans</i>   | Permeases of the major facilitator superfamily                               | up   |
| Unigene150413  | 0.5673  | 4.9145   | 3.108232903  | 7.34146E-06 | <i>Z. mays</i>        | Permeases of the major facilitator superfamily                               | up   |
| Unigene40195   | 0.11745 | 0.2396   | 1.028581195  | 0.01220935  | <i>A. thaliana</i>    | Permeases of the major facilitator superfamily                               | up   |
| Unigene1525801 | 0.5635  | 6.1652   | 3.464376713  | 1.06429E-07 | <i>H. vulgare</i>     | Adenine/guanine permease AZG2                                                | up   |
| Unigene125771  | 19.012  | 83.8693  | 2.059755829  | 6.3971E-217 | <i>Z. mays</i>        | ADP,ATP carrier protein 1, mitochondrial, ANT1                               | up   |
| Unigene37930   | 27.0312 | 158.5641 | 2.501327849  | 3.8832E-164 | <i>H. vulgare</i>     | ADP,ATP carrier protein, mitochondrial                                       | up   |
| Unigene140581  | 0.2242  | 1.7131   | 2.923808331  | 4.41035E-05 | <i>R. communis</i>    | Solute carrier                                                               | up   |
| Unigene149797  | 0       | 2.9664   | 5.508770832  | 8.76527E-07 | <i>E. siliculosus</i> | Thylakoid ADP,ATP carrier protein, chloroplastic, TAAC                       | up   |
| Unigene12434   | 12.8988 | 1.9195   | -2.743218707 | 3.27926E-16 | <i>Micromonas sp.</i> | Acyl carrier protein 2, mitochondrial, MTACP2                                | down |
| Unigene130941  | 4.127   | 0.876    | -2.230768706 | 1.74865E-05 | <i>P. trichocarpa</i> | Adenine/guanine permease AZG1                                                | down |
| Unigene62185   | 38.9368 | 2.9268   | -3.659341135 | 8.3831E-240 | <i>R. communis</i>    | Adenine/guanine permease AZG2                                                | down |
| Unigene126453  | 32.5577 | 3.9667   | -3.073456701 | 2.8066E-178 | <i>V. vinifera</i>    | ADP,ATP carrier protein 3, AAC3                                              | down |
| Unigene119139  | 12.0904 | 1.9572   | -2.428708083 | 5.22802E-17 | <i>G. max</i>         | solute carrier family 25 (mitochondrial oxoglutarate transporter), member 11 | down |
| Unigene139293  | 9.8717  | 0.8611   | -3.535623287 | 5.49152E-13 | <i>V. vinifera</i>    | solute carrier family 25 (mitochondrial oxoglutarate transporter), member 11 | down |

|               |        |        |              |             |                       |                                                                 |      |
|---------------|--------|--------|--------------|-------------|-----------------------|-----------------------------------------------------------------|------|
| Unigene134093 | 4.2774 | 0      | -6.308212791 | 4.72315E-11 | <i>K. micrum</i>      | Mitochondrial carnitine/acylcarnitine carrier-like protein      | down |
| Unigene132160 | 3.3872 | 0.2117 | -3.995054906 | 2.38452E-08 | <i>P. sojae</i>       | Mitochondrial import inner membrane translocase subunit TIM50   | down |
| Unigene134445 | 3.4018 | 0.167  | -4.342978209 | 5.18747E-06 | <i>O. sativa</i>      | Mitochondrial import inner membrane translocase subunit Tim8    | down |
| Unigene135649 | 3.2789 | 0.1166 | -4.808641782 | 4.50777E-08 | <i>Z. mays</i>        | Mitochondrial import receptor subunit TOM40 homolog 1 , TOM40-1 | down |
| Unigene134394 | 4.6084 | 0.198  | -4.535623287 | 8.62096E-07 | <i>P. sojae</i>       | Permeases of the drug/metabolite transporter superfamily        | down |
| Unigene130658 | 10.188 | 0.6179 | -4.038123628 | 7.21353E-23 | <i>P. infestans</i>   | Permeases of the major facilitator superfamily                  | down |
| Unigene134000 | 5.0186 | 0.2907 | -4.104466123 | 2.45664E-20 | <i>subellipsoidea</i> | Permeases of the major facilitator superfamily                  | down |
| Unigene135127 | 8.4068 | 0.7149 | -3.550573629 | 4.09337E-20 | --                    | Permeases of the major facilitator superfamily                  | down |
| Unigene134817 | 5.027  | 0.3898 | -3.669479034 | 4.75914E-17 | <i>E. siliculosus</i> | Permeases of the major facilitator superfamily                  | down |
| Unigene132992 | 4.7804 | 0.5    | -3.251830321 | 7.87774E-14 | <i>Z. mays</i>        | Permeases of the major facilitator superfamily                  | down |
| Unigene133941 | 5.212  | 0.2028 | -4.678581241 | 1.86139E-13 | <i>P. sojae</i>       | Permeases of the major facilitator superfamily                  | down |
| Unigene132099 | 6.0957 | 0      | -6.565370631 | 8.08715E-13 | <i>C. variabilis</i>  | Permeases of the major facilitator superfamily                  | down |
| Unigene134392 | 5.9599 | 0.8332 | -2.833303836 | 9.59303E-11 | <i>E. siliculosus</i> | Permeases of the major facilitator superfamily                  | down |
| Unigene133148 | 4.2717 | 0.3146 | -3.758015709 | 6.76283E-10 | --                    | Permeases of the major facilitator superfamily                  | down |
| Unigene132923 | 4.7535 | 0.4201 | -3.494981303 | 4.16201E-08 | <i>P. trichocarpa</i> | Permeases of the major facilitator superfamily                  | down |

|                         |         |         |              |             |                       |                                                                          |      |
|-------------------------|---------|---------|--------------|-------------|-----------------------|--------------------------------------------------------------------------|------|
| Unigene134838           | 4.2158  | 0.2898  | -3.857551382 | 1.42113E-07 | <i>Z. mays</i>        | Permeases of the major facilitator superfamily                           | down |
| Unigene132349           | 3.6831  | 0       | -5.342978209 | 2.42469E-06 | --                    | Permeases of the major facilitator superfamily                           | down |
| Unigene135608           | 3.8788  | 0.6059  | -2.673126811 | 2.65239E-06 | <i>Z. mays</i>        | Permeases of the major facilitator superfamily                           | down |
| Unigene133317           | 2.1013  | 0       | -4.857551382 | 8.13932E-05 | <i>Z. mays</i>        | Permeases of the major facilitator superfamily                           | down |
| Unigene130803           | 6.6903  | 0.5608  | -3.571247197 | 3.51623E-25 | <i>T. pseudonana</i>  | Nucleoside permease                                                      | down |
| Unigene131614           | 2.6652  | 0.2617  | -3.342978209 | 3.02654E-05 | <i>H. vulgare</i>     | solute carrier family 25 (mitochondrial phosphate transporter), member 3 | down |
| Unigene135394           | 12.0872 | 0.6165  | -4.287964107 | 1.98385E-62 | <i>moellendorffii</i> | S.<br>solute carrier family 39 (zinc transporter), member 1/2/3          | down |
| Unigene20264            | 0.7218  | 0       | -5.120585788 | 1.37805E-05 | <i>V. vinifera</i>    | Thylakoid ADP,ATP carrier protein, chloroplastic , TAAC                  | down |
| Unigene134576           | 10.1146 | 0.4438  | -4.505249638 | 2.37545E-22 | <i>H. vulgare</i>     | Importin subunit alpha-1b                                                | down |
| Unigene134742           | 11.1876 | 0.4523  | -4.620512185 | 7.21283E-64 | <i>H. vulgare</i>     | solute carrier family 25 (mitochondrial phosphate transporter), member 3 | down |
| Unigene37931            | 22.5427 | 2.2188  | -3.339539125 | 2.01222E-77 | <i>N. scintillans</i> | solute carrier family 30 (zinc transporter), member 2                    | down |
| <b>ABC transporters</b> |         |         |              |             |                       |                                                                          |      |
| Unigene147662           | 0.001   | 0.18235 | 7.510566389  | 0.006816782 | <i>N. tabacum</i>     | ABC transporter                                                          | up   |
| Unigene96594            | 0.001   | 0.3222  | 8.331812684  | 0.006788476 | <i>P. trichocarpa</i> | ABC transporter B family member 10, ABCB10                               | up   |
| Unigene123809           | 0.0453  | 0.3635  | 3.219264215  | 0.000110988 | <i>C. roseus</i>      | ABC transporter C family member 13, ABCC13                               | up   |
| Unigene149995           | 0.1034  | 4.4084  | 5.406891218  | 1.99561E-11 | <i>A. thaliana</i>    | ABC transporter F family member 1, ABCF1                                 | up   |
| Unigene151966           | 1.2695  | 7.2043  | 2.464376713  | 3.64862E-08 | --                    | ABC transporter                                                          | up   |

|               |         |        |              |             |                       |                                                            |      |
|---------------|---------|--------|--------------|-------------|-----------------------|------------------------------------------------------------|------|
| Unigene133885 | 4.8819  | 0      | -5.950660786 | 5.42407E-09 | <i>C. variabilis</i>  | ABC transporter A family member 1, ABCA1                   | down |
| Unigene135275 | 7.7186  | 0.5305 | -3.857551382 | 7.18739E-23 | <i>E. siliculosus</i> | ABC transporter B family member 13, ABCB13                 | down |
| Unigene133914 | 3.2945  | 0.1477 | -4.474222743 | 1.56486E-06 | <i>P. patens</i>      | ABC transporter B family member 15, ABCB15                 | down |
| Unigene139010 | 9.9272  | 1.724  | -2.535623287 | 4.93075E-14 | <i>V. vinifera</i>    | ABC transporter B family member 19, ABCB19                 | down |
| Unigene132470 | 3.6422  | 0.2889 | -3.651100505 | 1.54124E-06 | <i>R. communis</i>    | ABC transporter B family member 24, ABCB24                 | down |
| Unigene135276 | 6.0423  | 0.1832 | -5.038123628 | 5.23183E-25 | <i>M. pusilla</i>     | ABC transporter B family member 29, ABCB29                 | down |
| Unigene131796 | 4.6669  | 0.2187 | -4.410092405 | 3.57255E-11 | <i>C. variabilis</i>  | ABC transporter B family member 7, ABCB7                   | down |
| Unigene134071 | 3.0221  | 0.3462 | -3.120585788 | 4.4579E-06  | <i>A. thaliana</i>    | ABC transporter C family member 12, ABCC12                 | down |
| Unigene134070 | 2.3865  | 0.164  | -3.857551382 | 0.00019832  | <i>P. sojae</i>       | ABC transporter C family member 5, ABCC5                   | down |
| Unigene132149 | 2.9418  | 0      | -4.758015709 | 0.000148525 | <i>V. vinifera</i>    | ABC transporter E family member 2, ABCE2                   | down |
| Unigene134399 | 3.8925  | 0.1982 | -4.290510789 | 4.55794E-19 | <i>V. carteri</i>     | ABC transporter F family member 1, ABCF1                   | down |
| Unigene10365  | 74.5911 | 4.9959 | -3.893301407 | 0           | <i>H. vulgare</i>     | ABC transporter F family member 4, ABCF4                   | down |
| Unigene10876  | 19.1765 | 1.5266 | -3.600002515 | 9.4017E-103 | <i>V. vinifera</i>    | ABC transporter G family member 11, ABCG11                 | down |
| Unigene113882 | 2.9164  | 0.5197 | -2.494981303 | 3.23228E-06 | <i>R. communis</i>    | ABC transporter G family member 34, ABCG34                 | down |
| Unigene50467  | 15.0831 | 1.132  | -3.730729883 | 1.9222E-166 | <i>R. communis</i>    | ABC-type dipeptide transport system, periplasmic component | down |

|                                |         |        |              |             |                       |                                                               |      |
|--------------------------------|---------|--------|--------------|-------------|-----------------------|---------------------------------------------------------------|------|
| Unigene132535                  | 3.1014  | 0.1453 | -4.410092405 | 2.84625E-06 | <i>O. sativa</i>      | ABC-type dipeptide transport system, periplasmic component    | down |
| Unigene129579                  | 33.8268 | 2.7462 | -3.617417378 | 1.8024E-99  | <i>P. sojae</i>       | ABC-type dipeptide transport system, periplasmic component    | down |
| Unigene133510                  | 15.0168 | 1.3335 | -3.488094917 | 6.90384E-41 | <i>P. infestans</i>   | ABC-type dipeptide transport system, periplasmic component    | down |
| Unigene136125                  | 2.8706  | 0      | -5.705548289 | 8.28913E-08 | <i>H. vulgare</i>     | ABC-type multidrug transport system, permease component       | down |
| Unigene130918                  | 7.0554  | 0.2538 | -4.79196304  | 4.7894E-21  | <i>Micromonas sp.</i> | ABC-type uncharacterized transport system, permease component | down |
| Unigene131899                  | 3.8082  | 0      | -6.376925541 | 1.68796E-11 | <i>P. vulgaris</i>    | ATP-binding cassette, subfamily B (MDR/TAP), member 1         | down |
| Unigene130686                  | 3.5797  | 0.205  | -4.120585788 | 3.17901E-05 | <i>N. tabacum</i>     | Pleiotropic drug resistance protein 3, PDR3                   | down |
| Unigene54592                   | 0.4815  | 0.0583 | -3.120585788 | 0.000179145 | <i>V. vinifera</i>    | Na <sup>+</sup> -driven multidrug efflux pump                 | down |
| <b>Amino acid transporters</b> |         |        |              |             |                       |                                                               |      |
| Unigene152266                  | 0.4207  | 5.0294 | 3.57290117   | 1.11762E-10 | --                    | Amino acid transporter                                        | up   |
| Unigene152088                  | 0.4475  | 5.35   | 3.57290117   | 5.09293E-06 | <i>P. patens</i>      | Amino acid transporter                                        | up   |
| Unigene150317                  | 0.1755  | 3.4666 | 4.297266727  | 1.09418E-05 | --                    | Amino acid transporter                                        | up   |
| Unigene152018                  | 0       | 3.2695 | 4.856694136  | 0.000107859 | <i>V. mungo</i>       | Amino acid transporter                                        | up   |
| Unigene152703                  | 0       | 4.3088 | 5.371267308  | 2.84275E-06 | <i>Z. mays</i>        | Ammonia permease                                              | up   |
| Unigene91442                   | 0.378   | 1.8434 | 2.322357708  | 5.00895E-09 | <i>R. communis</i>    | Lysine histidine transporter 1, LHT1                          | up   |
| Unigene136715                  | 2.0996  | 0      | -5.474222743 | 7.76128E-07 | <i>T. pseudonana</i>  | Amino acid permeases                                          | down |
| Unigene133103                  | 2.8461  | 0      | -5.474222743 | 7.76128E-07 | --                    | Amino acid permeases                                          | down |
| Unigene134389                  | 10.0232 | 0.6183 | -4.013670584 | 4.1858E-50  | <i>P. patens</i>      | Amino acid transporters                                       | down |
| Unigene134560                  | 3.2922  | 0.5304 | -2.628732692 | 4.59074E-06 | <i>C. variabilis</i>  | Amino-acid permease BAT1 homolog, BAT1                        | down |
| Unigene134559                  | 9.5878  | 0.4707 | -4.342978209 | 1.78478E-33 | <i>B. distachyon</i>  | Amino-acid permease BAT1 homolog, BAT1                        | down |
| Unigene19640                   | 1.7934  | 0.3414 | -2.272588881 | 2.46012E-06 | <i>A. lyrata</i>      | Lysine histidine transporter 1, LHT1                          | down |

|               |         |          |              |             |                       |                                                                                      |      |
|---------------|---------|----------|--------------|-------------|-----------------------|--------------------------------------------------------------------------------------|------|
| Unigene116627 | 45.948  | 2.1327   | -4.423623989 | 0           | <i>P. patens</i>      | Cationic amino acid transporter 2, CAT2                                              | down |
| Unigene102257 | 21.6736 | 1.3807   | -3.965307562 | 7.2498E-164 | <i>P. patens</i>      | Cationic amino acid transporter 9, CAT9                                              | down |
| <b>Others</b> |         |          |              |             |                       |                                                                                      |      |
| Unigene4864   | 0.001   | 0.1282   | 7.002252452  | 0.0141614   | <i>V. vinifera</i>    | Auxin transport<br>Probable auxin efflux carrier component 6,                        | up   |
| Unigene39089  | 1.4745  | 6.9057   | 2.119728541  | 2.55553E-06 | <i>V. vinifera</i>    | PIN6                                                                                 | up   |
| Unigene151134 | 0.3993  | 3.7355   | 3.219264215  | 2.20234E-06 | <i>V. carteri</i>     | Protein ycf2                                                                         | up   |
| Unigene23038  | 0.001   | 0.17965  | 7.489045125  | 0.006838707 | <i>V. vinifera</i>    | Probable aquaporin PIP2-5                                                            | up   |
| Unigene150611 | 0.0939  | 4.784    | 5.664049058  | 2.05071E-13 | <i>A. thaliana</i>    | Peptide transporter PTR1                                                             | up   |
| Unigene151950 | 0       | 3.218    | 4.856694136  | 0.000107859 | <i>Zea mays</i>       | other                                                                                | up   |
| Unigene44342  | 0.4004  | 3.7765   | 3.239163772  | 5.94545E-15 | <i>P. trichocarpa</i> | other                                                                                | up   |
| Unigene135765 | 3.3344  | 0        | -5.594516976 | 2.51971E-07 | <i>T. oceanica</i>    | other                                                                                | down |
| Unigene133662 | 4.2026  | 0.2167   | -4.272588881 | 9.47375E-06 | <i>E. siliculosus</i> | other                                                                                | down |
| Unigene88753  | 8.1011  | 1.9841   | -2.066138004 | 1.16748E-05 | <i>P. sitchensis</i>  | other                                                                                | down |
| Unigene74909  | 1537.91 | 265.7765 | -2.429783726 | 0           | <i>P. trichocarpa</i> | 14 kDa proline-rich protein DC2.15<br>Ammonium transporter 2 member 1, AMT2-         | down |
| Unigene132878 | 2.6473  | 0        | -5.808641782 | 2.76096E-08 | <i>Z. mays</i>        | 1                                                                                    | down |
| Unigene86727  | 25.2727 | 6.2072   | -2.014670026 | 2.4554E-114 | <i>P. trichocarpa</i> | Auxin efflux carrier component 2, PIN2<br>Probable auxin efflux carrier component 2, | down |
| Unigene86728  | 27.9208 | 4.5941   | -2.595648058 | 8.38867E-92 | <i>P. trichocarpa</i> | PIN2<br>Heavy metal-associated isoprenylated plant                                   | down |
| Unigene125793 | 139.926 | 10.1586  | -3.769764667 | 0           | <i>R. communis</i>    | protein 26 , HIPP26                                                                  | down |
| Unigene135298 | 8.7101  | 0.4869   | -4.155775216 | 9.32163E-37 | <i>subellipsoidea</i> | Metal-nicotianamine transporter YSL2                                                 | down |
| Unigene139560 | 4.2691  | 0.8267   | -2.32917241  | 0.000115707 | <i>M. truncatula</i>  | Nucleobase-ascorbate transporter 1 , NAT1                                            | down |
| Unigene132563 | 3.7451  | 0.4065   | -3.1985883   | 9.9151E-05  | <i>R. communis</i>    | Oligopeptide transporter 3, OPT3                                                     | down |
| Unigene134498 | 3.9202  | 0        | -5.410092405 | 1.36931E-06 | <i>B. distachyon</i>  | Oligopeptide transporter 7, OPT7                                                     | down |
| Unigene49338  | 28.0518 | 2.2785   | -3.616470417 | 4.225E-294  | <i>V. vinifera</i>    | Oligopeptide transporter 7, OPT7                                                     | down |
| Unigene46682  | 0.1346  | 0.001    | -7.0725346   | 2.01686E-05 | <i>S. nigrum</i>      | Probable aquaporin SIP2-1                                                            | down |

|               |         |        |              |             |                  |                                                  |      |
|---------------|---------|--------|--------------|-------------|------------------|--------------------------------------------------|------|
| Unigene10534  | 21.0501 | 1.2813 | -4.032891727 | 2.4676E-229 | <i>G. max</i>    | Probable metal-nicotianamine transporter<br>YSL8 | down |
| Unigene24832  | 3.7207  | 0.8256 | -2.187699984 | 2.90809E-05 | <i>P. sojae</i>  | Protein ycf2 (Fragment) ycf2                     | down |
| Unigene90644  | 10.8074 | 1.9477 | -2.466910537 | 1.43085E-34 | <i>P. sojae</i>  | Putative membrane protein ycf1                   | down |
| Unigene136149 | 3.0916  | 0      | -5.410092405 | 1.36931E-06 | <i>O. sativa</i> | other                                            | down |



**Table S3: Unigenes used in network analysis to generate Fig. 3**

| <b>Gene</b> | <b>Gene1</b>     | <b>Gene2</b>      | <b>Score</b> | <b>Annotation</b>                                           |
|-------------|------------------|-------------------|--------------|-------------------------------------------------------------|
| ERF114      | Unigene35061_All | Unigene150734_All | 0.247453     | 60S ribosomal protein L27a-3                                |
| ERF114      | Unigene35061_All | Unigene65397_All  | 0.247453     | 60S ribosomal protein L28-1                                 |
| ERF114      | Unigene35061_All | Unigene150479_All | 0.247453     | Proline-rich receptor-like protein kinase PERK2             |
| ERF114      | Unigene35061_All | Unigene74826_All  | 0.247453     | 60S ribosomal protein L30                                   |
| ERF114      | Unigene35061_All | Unigene150439_All | 0.247453     | 60S acidic ribosomal protein P1                             |
| ERF114      | Unigene35061_All | Unigene151582_All | 0.258721     | Extensin                                                    |
| ERF114      | Unigene35061_All | Unigene52220_All  | 0.258721     | 60S ribosomal protein L35a-1                                |
| ERF114      | Unigene35061_All | Unigene150906_All | 0.242665     | Proline-rich receptor-like protein kinase PERK2             |
| ERF114      | Unigene35061_All | Unigene150421_All | 0.242665     | Pectinesterase 2                                            |
| ERF114      | Unigene35061_All | Unigene152320_All | 0.29885      | Vegetative cell wall protein gp1                            |
| ERF114      | Unigene35061_All | Unigene76863_All  | 0.249152     | 60S ribosomal protein L34                                   |
| ERF114      | Unigene35061_All | Unigene52552_All  | 0.247453     | 40S ribosomal protein S26-3                                 |
| ERF114      | Unigene35061_All | Unigene88258_All  | 0.258721     | 60S ribosomal protein L35                                   |
| ERF114      | Unigene35061_All | Unigene76954_All  | 0.237926     | 60S ribosomal protein L27                                   |
| ERF114      | Unigene35061_All | Unigene88897_All  | 0.237926     | 60S ribosomal protein L19-3                                 |
| ERF114      | Unigene35061_All | Unigene65284_All  | 0.237926     | 60S ribosomal protein L7a                                   |
| ERF114      | Unigene35061_All | Unigene25154_All  | 0.249152     | Agmatine coumaroyltransferase-2                             |
| ERF114      | Unigene35061_All | Unigene88252_All  | 0.237926     | 60S ribosomal protein L14                                   |
| ERF114      | Unigene35061_All | Unigene64953_All  | 0.249152     | 40S ribosomal protein S29                                   |
| ERF114      | Unigene35061_All | Unigene151170_All | 0.235708     | 60S ribosomal protein L6-1                                  |
| ERF114      | Unigene35061_All | Unigene37024_All  | 0.237926     | 60S ribosomal protein L17                                   |
| ERF114      | Unigene35061_All | Unigene152338_All | 0.258721     | Elongation factor 1-gamma 3                                 |
| ERF114      | Unigene35061_All | Unigene23630_All  | 0.258721     | Pollen-specific leucine-rich repeat extensin-like protein 1 |
| ERF114      | Unigene35061_All | Unigene150352_All | 0.247453     | 40S ribosomal protein S7                                    |
| ERF114      | Unigene35061_All | Unigene128845_All | 0.247453     | 40S ribosomal protein S10                                   |
| ERF114      | Unigene35061_All | Unigene126725_All | 0.237926     | 40S ribosomal protein S3a-2                                 |
| ERF114      | Unigene35061_All | Unigene88245_All  | 0.237926     | 60S ribosomal protein L26-2                                 |
| ERF114      | Unigene35061_All | Unigene116322_All | 0.244947     | Betaine aldehyde dehydrogenase                              |

|        |                  |                   |          |                                               |
|--------|------------------|-------------------|----------|-----------------------------------------------|
| ERF114 | Unigene35061_All | Unigene90715_All  | 0.29885  | Anther-specific proline-rich protein APG      |
| ERF114 | Unigene35061_All | Unigene37646_All  | 0.237926 | Eukaryotic translation initiation factor 5A-1 |
| ERF114 | Unigene35061_All | Unigene150933_All | 0.247453 | 60S ribosomal protein L18a                    |
| ERF114 | Unigene35061_All | Unigene152410_All | 0.258721 | 40S ribosomal protein S23                     |
| ERF114 | Unigene35061_All | Unigene78218_All  | 0.235708 | Tubulin beta-8 chain                          |
| ERF114 | Unigene35061_All | Unigene101984_All | 0.237926 | 60S ribosomal protein L9                      |
| ERF114 | Unigene35061_All | Unigene51833_All  | 0.237926 | 60S ribosomal protein L36-1                   |
| ERF114 | Unigene35061_All | Unigene103611_All | 0.289185 | Extensin HRGP                                 |
| ERF114 | Unigene35061_All | Unigene74456_All  | 0.237926 | Eukaryotic initiation factor 4A-3             |
| ERF114 | Unigene35061_All | Unigene24440_All  | 0.237926 | 40S ribosomal protein S16-1                   |
| ERF114 | Unigene35061_All | Unigene150601_All | 0.253737 | Nucleolin 1                                   |
| ERF114 | Unigene35061_All | Unigene10207_All  | 0.237926 | 60S ribosomal protein L32-1                   |
| ERF114 | Unigene35061_All | Unigene149930_All | 0.235708 | MLO-like protein 14                           |
| ERF114 | Unigene35061_All | Unigene88349_All  | 0.237926 | Elongation factor 1-alpha                     |
| ERF114 | Unigene35061_All | Unigene151010_All | 0.239721 | Pentatricopeptide repeat-containing protein   |
| ERF114 | Unigene35061_All | Unigene154422_All | 0.235708 | Protein kinase APK1A                          |
| ERF114 | Unigene35061_All | Unigene74438_All  | 0.249152 | 40S ribosomal protein S15a-3                  |
| ERF114 | Unigene35061_All | Unigene10777_All  | 0.237926 | 40S ribosomal protein S27-2                   |
| ERF114 | Unigene35061_All | Unigene125771_All | 0.237926 | ADP,ATP carrier protein 1 ANT1                |
| ERF114 | Unigene35061_All | Unigene5741_All   | 0.235708 | U-box domain-containing protein 10            |
| ERF114 | Unigene35061_All | Unigene116294_All | 0.237926 | 60S ribosomal protein L37-2                   |
| ERF114 | Unigene35061_All | Unigene100954_All | 0.237926 | 40S ribosomal protein S4                      |
| ERF114 | Unigene35061_All | Unigene115565_All | 0.276359 | 60S ribosomal protein L8                      |
| ERF114 | Unigene35061_All | Unigene51651_All  | 0.237926 | 40S ribosomal protein S11                     |
| ERF114 | Unigene35061_All | Unigene150763_All | 0.258721 | 60S ribosomal protein L29-1                   |
| ERF114 | Unigene35061_All | Unigene150106_All | 0.235708 | 29 kDa ribonucleoprotein A                    |
| ERF114 | Unigene35061_All | Unigene103167_All | 0.237926 | 60S acidic ribosomal protein                  |
| ERF114 | Unigene35061_All | Unigene115161_All | 0.237926 | 40S ribosomal protein S5                      |
| ERF114 | Unigene35061_All | Unigene60515_All  | 0.269785 | Pyruvate dehydrogenase E1 pbhB                |
| ERF114 | Unigene35061_All | Unigene150235_All | 0.235708 | Cold shock protein 1 CSP1                     |
| ERF114 | Unigene35061_All | Unigene50333_All  | 0.237926 | 40S ribosomal protein S28                     |
| ERF114 | Unigene35061_All | Unigene90287_All  | 0.237926 | 40S ribosomal protein S18                     |
| ERF114 | Unigene35061_All | Unigene116826_All | 0.237926 | 60S ribosomal protein L39                     |

|        |                  |                   |                                                                           |
|--------|------------------|-------------------|---------------------------------------------------------------------------|
| ERF114 | Unigene35061_All | Unigene127331_All | 0.29885 Uncharacterized protein At5g39570                                 |
| ERF114 | Unigene35061_All | Unigene150578_All | 0.247453 40S ribosomal protein S3-2                                       |
| ERF114 | Unigene35061_All | Unigene51771_All  | 0.237926 60S ribosomal protein L18                                        |
| ERF114 | Unigene35061_All | Unigene127657_All | 0.249152 60S ribosomal protein L10                                        |
| ERF114 | Unigene35061_All | Unigene21151_All  | 0.237926 Ubiquitin-fold modifier 1                                        |
| ERF114 | Unigene35061_All | Unigene115288_All | 0.249152 40S ribosomal protein S15                                        |
| ERF114 | Unigene35061_All | Unigene51535_All  | 0.237926 40S ribosomal protein S25                                        |
| ERF114 | Unigene35061_All | Unigene76994_All  | 0.242665 40S ribosomal protein S21                                        |
| ERF114 | Unigene35061_All | Unigene150851_All | 0.258721 60S ribosomal protein L5                                         |
| ERF114 | Unigene35061_All | Unigene24245_All  | 0.247453 60S ribosomal protein L24                                        |
| ERF114 | Unigene35061_All | Unigene150143_All | 0.263467 Cold shock domain-containing protein 3 CSP3                      |
| ERF114 | Unigene35061_All | Unigene103078_All | 0.258721 60S ribosomal protein L15-1                                      |
| ERF114 | Unigene35061_All | Unigene116737_All | 0.28302 Vegetative cell wall protein gp1                                  |
| ERF114 | Unigene35061_All | Unigene75910_All  | 0.247453 UDP-glucose 4-epimerase GEPI48                                   |
| ERF114 | Unigene35061_All | Unigene102997_All | 0.237926 40S ribosomal protein S20-2                                      |
| ERF114 | Unigene35061_All | Unigene38087_All  | 0.247453 60S ribosomal protein L11-2                                      |
| ERF114 | Unigene35061_All | Unigene52325_All  | 0.285952 60S acidic ribosomal protein P2B                                 |
| ERF114 | Unigene35061_All | Unigene76073_All  | 0.247453 60S ribosomal protein L23A                                       |
| ERF114 | Unigene35061_All | Unigene22872_All  | 0.237926 Probable mediator of RNA polymerase II transcription subunit 37e |
| ERF114 | Unigene35061_All | Unigene65269_All  | 0.247453 60S ribosomal protein L6-2                                       |
| ERF114 | Unigene35061_All | Unigene152403_All | 0.237926 60S ribosomal protein L18a-2                                     |
| ERF114 | Unigene35061_All | Unigene88787_All  | 0.237926 ATP synthase subunit 9, mitochondrial                            |
| ERF114 | Unigene35061_All | Unigene50163_All  | 0.237926 40S ribosomal protein S6                                         |
| ARF 25 | Unigene60441_All | Unigene63897_All  | 0.220727 --                                                               |
| ARF 25 | Unigene60441_All | Unigene24572_All  | 0.364412 GDSL esterase/lipase At1g54790                                   |
| ARF 25 | Unigene60441_All | Unigene124338_All | 0.337775 Cytochrome P450 94A1                                             |
| ARF 25 | Unigene60441_All | Unigene53113_All  | 0.359757 Probable ubiquitin-conjugating enzyme E2 23                      |
| ARF 25 | Unigene60441_All | Unigene30041_All  | 0.366275 Chaperone protein dnaJ 49                                        |
| ARF 25 | Unigene60441_All | Unigene19670_All  | 0.362112 Probable eukaryotic translation initiation factor 5-2            |
| ARF 25 | Unigene60441_All | Unigene60472_All  | 0.344505 Nucleolin 2                                                      |
| ARF 25 | Unigene60441_All | Unigene25129_All  | 0.347944 Trehalose-phosphate phosphatase A TPPA                           |

|        |                  |                   |                                                                        |
|--------|------------------|-------------------|------------------------------------------------------------------------|
| ARF 25 | Unigene60441_All | Unigene54967_All  | 0.343931 Uncharacterized protein At1g10890                             |
| ARF 25 | Unigene60441_All | Unigene72260_All  | 0.337938 E3 ubiquitin-protein ligase RMA1                              |
| ARF 25 | Unigene60441_All | Unigene29962_All  | 0.344505 COP9 signalosome complex subunit 4 CSN4                       |
| ARF 25 | Unigene60441_All | Unigene46383_All  | 0.34985 Allene oxide synthase, chloroplastic CYP74A                    |
| ARF 25 | Unigene60441_All | Unigene70703_All  | 0.365227 Ubiquitin carboxyl-terminal hydrolase 16 UBP16                |
| ARF 25 | Unigene60441_All | Unigene94122_All  | 0.371613 Wall-associated receptor kinase-like 10 WAKL10                |
| ARF 25 | Unigene60441_All | Unigene148723_All | 0.366275 Heparanase-like protein 3                                     |
| ARF 25 | Unigene60441_All | Unigene160190_All | 0.218512 --                                                            |
| ARF 25 | Unigene60441_All | Unigene106123_All | 0.364492 Protein transport protein Sec24-like At3g07100                |
| ARF 25 | Unigene60441_All | Unigene47511_All  | 0.222566 --                                                            |
| ARF 25 | Unigene60441_All | Unigene111787_All | 0.232815 --                                                            |
| ARF 25 | Unigene60441_All | Unigene104096_All | 0.364492 Light-regulated protein LIR1                                  |
| ARF 25 | Unigene60441_All | Unigene122545_All | 0.326546 4-hydroxybenzoate polyprenyltransferase, mitochondrial        |
| ARF 25 | Unigene60441_All | Unigene149724_All | 0.377336 Probable peptide/nitrate transporter At3g53960                |
| ARF 25 | Unigene60441_All | Unigene64652_All  | 0.22455 Lignin-forming anionic peroxidase                              |
| ARF 25 | Unigene60441_All | Unigene47957_All  | 0.343653 5'-methylthioadenosine/S-adenosylhomocysteine nucleosidase    |
| ARF 25 | Unigene60441_All | Unigene48187_All  | 0.352714 Wall-associated receptor kinase-like 1 WAKL1                  |
| ARF 25 | Unigene60441_All | Unigene102983_All | 0.343653 Probable fructose-bisphosphate aldolase 1, chloroplastic FBA1 |
| ARF 25 | Unigene60441_All | Unigene111496_All | 0.333764 GDP-L-galactose phosphorylase 1 VTC2                          |
| ARF 25 | Unigene60441_All | Unigene69228_All  | 0.343022 DEAD-box ATP-dependent RNA helicase 3, chloroplastic          |
| ARF 25 | Unigene60441_All | Unigene120810_All | 0.356746 Transcription factor bHLH130                                  |
| ARF 25 | Unigene60441_All | Unigene69859_All  | 0.223082 --                                                            |
| ARF 25 | Unigene60441_All | Unigene76581_All  | 0.221465 --                                                            |
| ARF 25 | Unigene60441_All | Unigene11706_All  | 0.352046 Alcohol dehydrogenase 3 ADH3                                  |
| ARF 25 | Unigene60441_All | Unigene58511_All  | 0.359757 Magnesium transporter MRS2-1                                  |
| ARF 25 | Unigene60441_All | Unigene18392_All  | 0.321764 Soluble inorganic pyrophosphatase IPP                         |
| ARF 25 | Unigene60441_All | Unigene107038_All | 0.333036 Potassium channel SKOR                                        |
| ARF 25 | Unigene60441_All | Unigene39089_All  | 0.327437 Probable auxin efflux carrier component 6 PIN6                |
| ARF 25 | Unigene60441_All | Unigene91364_All  | 0.343224 Pyruvate dehydrogenase E1 component subunit alpha             |
| ARF 25 | Unigene60441_All | Unigene4963_All   | 0.365227 Isoflavone reductase homolog                                  |
| ARF 25 | Unigene60441_All | Unigene127745_All | 0.336485 Beta-D-xylosidase 1 BXL1                                      |
| ARF 25 | Unigene60441_All | Unigene74595_All  | 0.320924 Cationic peroxidase 1 PNC1                                    |
| ARF 25 | Unigene60441_All | Unigene38541_All  | 0.340126 Inositol monophosphatase 3 IMP3                               |

|        |                  |                   |                                                                                                                        |
|--------|------------------|-------------------|------------------------------------------------------------------------------------------------------------------------|
| ARF 25 | Unigene60441_All | Unigene60200_All  | 0.337775 Probable trans-2-enoyl-CoA reductase, mitochondrial                                                           |
| ARF 25 | Unigene60441_All | Unigene8113_All   | 0.358253 Proline-rich receptor-like protein kinase PERK2                                                               |
| ARF 25 | Unigene60441_All | Unigene23891_All  | 0.229854 Gibberellin 2-beta-dioxygenase 8 GA2OX7                                                                       |
| ARF 25 | Unigene60441_All | Unigene66618_All  | 0.361443 Acyl carrier protein 1 ACP1                                                                                   |
| ARF 25 | Unigene60441_All | Unigene60446_All  | 0.348685 Carbon catabolite repressor protein 4 homolog 4 CCR4-4                                                        |
| ARF 25 | Unigene60441_All | Unigene52895_All  | 0.323784 Ubiquitin-conjugating enzyme E2-23 kDa UBC4                                                                   |
| ARF 25 | Unigene60441_All | Unigene159085_All | 0.314926 Structural maintenance of chromosomes protein 2-2 SMC2-2                                                      |
| ARF 25 | Unigene60441_All | Unigene148811_All | 0.341788 ENHANCER OF AG-4 protein 2 HUA2                                                                               |
| ARF 25 | Unigene60441_All | Unigene128334_All | 0.341167 Pentatricopeptide repeat-containing protein At4g38010 PCMP-                                                   |
| ARF 25 | Unigene60441_All | Unigene102882_All | 0.219004 Probable carboxylesterase 9 CXE9                                                                              |
| ARF 25 | Unigene60441_All | Unigene28590_All  | 0.354248 Katanin p80 WD40 repeat-containing subunit B1 homolog 1                                                       |
| ARF 25 | Unigene60441_All | Unigene24126_All  | 0.352046 L-ascorbate peroxidase 1, cytosolic APX1                                                                      |
| ARF 25 | Unigene60441_All | Unigene17647_All  | 0.340914 MYST-like histone acetyltransferase 2 HAG5                                                                    |
| ARF 25 | Unigene60441_All | Unigene79681_All  | 0.339069 Heat shock 70 kDa protein 15 HSP70                                                                            |
| ARF 25 | Unigene60441_All | Unigene116865_All | 0.337775 --                                                                                                            |
| ARF 25 | Unigene60441_All | Unigene152117_All | 0.358256 Hexokinase-1 HXK1                                                                                             |
| ARF 25 | Unigene60441_All | Unigene80389_All  | 0.33891 Ubiquitin-conjugating enzyme E2 29 UBC29                                                                       |
| ARF 25 | Unigene60441_All | Unigene112803_All | 0.370016 50S ribosomal protein L12, RPL12-2                                                                            |
| ARF 25 | Unigene60441_All | Unigene116998_All | 0.337648 Putative SWI/SNF-related matrix-associated actin-dependent regulator of chromatin subfamily A member 3-like 3 |
| ARF 25 | Unigene60441_All | Unigene43887_All  | 0.375652 Coatomer subunit gamma-2                                                                                      |
| ARF 25 | Unigene60441_All | Unigene64519_All  | 0.319665 Probable galacturonosyltransferase 4 GAUT4                                                                    |
| ARF 25 | Unigene60441_All | Unigene44670_All  | 0.365227 Mechanosensitive ion channel protein 2, MSL2                                                                  |
| ARF 25 | Unigene60441_All | Unigene34867_All  | 0.354248 Bifunctional aspartokinase/homoserine dehydrogenase                                                           |
| ARF 25 | Unigene60441_All | Unigene107965_All | 0.338339 Dynamin-related protein 3A DRP3A                                                                              |
| ARF 25 | Unigene60441_All | Unigene25568_All  | 0.355866 Probable inactive receptor-like protein kinase At3g56050                                                      |
| ARF 25 | Unigene60441_All | Unigene110579_All | 0.340081 Pyruvate kinase isozyme G, chloroplastic (Fragment)                                                           |
| ARF 25 | Unigene60441_All | Unigene112391_All | 0.351599 60S ribosomal protein L18a-1                                                                                  |
| ARF 25 | Unigene60441_All | Unigene94521_All  | 0.228088 --                                                                                                            |
| ARF 25 | Unigene60441_All | Unigene66078_All  | 0.355001 Probable serine/threonine-protein kinase At1g01540                                                            |
| ARF 25 | Unigene60441_All | Unigene159439_All | 0.31799 5-methyltetrahydropteroyltriglutamate--homocysteine methyltransferase                                          |

|        |                  |                   |          |                                                                                                                  |
|--------|------------------|-------------------|----------|------------------------------------------------------------------------------------------------------------------|
| ARF 25 | Unigene60441_All | Unigene57651_All  | 0.365227 | Probably inactive leucine-rich repeat receptor-like protein kinase<br>At5g48380                                  |
| ARF 25 | Unigene60441_All | Unigene147396_All | 0.340126 | AP-1 complex subunit gamma-2                                                                                     |
| ARF 25 | Unigene60441_All | Unigene94571_All  | 0.32915  | Serine carboxypeptidase-like 13 SCPL13                                                                           |
| ARF 25 | Unigene60441_All | Unigene52093_All  | 0.358764 | Probable pectinesterase 68 PME68                                                                                 |
| ARF 25 | Unigene60441_All | Unigene56225_All  | 0.358217 | Pto-interacting protein 1PTI1                                                                                    |
| ARF 25 | Unigene60441_All | Unigene97416_All  | 0.334707 | Probable phytol kinase 1, chloroplastic                                                                          |
| ARF 25 | Unigene60441_All | Unigene101487_All | 0.352046 | Cytokinin dehydrogenase 1 CKX1                                                                                   |
| ARF 25 | Unigene60441_All | Unigene117440_All | 0.339867 | Mitogen-activated protein kinase homolog MMK1                                                                    |
| ARF 25 | Unigene60441_All | Unigene19731_All  | 0.338317 | Cytochrome c                                                                                                     |
| ARF 25 | Unigene60441_All | Unigene84237_All  | 0.34725  | Cysteine proteinase RD21A                                                                                        |
| ARF 25 | Unigene60441_All | Unigene98898_All  | 0.360882 | Mitogen-activated protein kinase 8 MPK8                                                                          |
| ARF 25 | Unigene60441_All | Unigene64991_All  | 0.335126 | Putative SWI/SNF-related matrix-associated actin-dependent<br>regulator of chromatin subfamily A member 3-like 3 |

## Supplemental Table S4

Primer sequences used for qRT-PCR analysis: The unigene sequences obtained by transcriptome analysis were used to design primers with the help of <http://www.ncbi.nlm.nih.gov/tools/primer-blast/> online tool and were used in qRT-PCR analysis.

| Unigene name                      | Primer sequence 5'-3'                                                       |
|-----------------------------------|-----------------------------------------------------------------------------|
| Unigene84659<br><i>IAA11</i>      | Forward primer GGAGGACAACGACCCGATAC<br>Reverse primer GGCTCATACGCTGGAAGACA  |
| Unigene146802<br><i>ABP19a</i>    | Forward primer CGTTATCTGCAGCCCAGCAT<br>Reverse primer TACAAGACGCTTCGTAAGGGG |
| Unigene152475<br><i>GH3.1</i>     | Forward primer AGAATTATCTGCCACCCGGC<br>Reverse primer TGCAGAAGGCCGTCAAAGAT  |
| Unigene16981<br><i>AUX22D</i>     | Forward primer AGCCAATTCATCCGGAACCA<br>Reverse primer TCCAGATGGGGAAGACGAT   |
| Unigene9234<br><i>5NG4</i>        | Forward primer GCTGTGGGATTGGAGCACTA<br>Reverse primer ATGCTGGTTCTTGGTGCAGT  |
| Unigene152612<br><i>SAM2</i>      | Forward primer ATGGGAGGGAACCGTCGTTA<br>Reverse primer CCAGGGTATCATGTTCCGGCT |
| Unigene150391<br><i>ACCox</i>     | Forward primer GGAGGATTTGCCCGTTGTCT<br>Reverse primer GGGCACGGGGGATAGTAATG  |
| Unigene150671<br><i>SHMT</i>      | Forward primer TGCAGCGTAGTCGATTTCA<br>Reverse primer CTGATGGGACTGGATCTGCC   |
| Unigene151662<br><i>MethSynI</i>  | Forward primer GACCTGGTTGGAGCCAATCTT<br>Reverse primer AACCTTCCCAAGCTTGTCTT |
| Unigene150679<br><i>MethSynII</i> | Forward primer GGTTGGGTCCAGTCTTACGG<br>Reverse primer ACCCTTCATGGGCTTCTTGG  |
| Unigene151933<br><i>MAPK3</i>     | Forward primer TCGAAGTGTGTTTTCGCTGC<br>Reverse primer AAATGCTTGAAGGCAAGCCG  |
| Unigene151582<br><i>Extensin</i>  | Forward primer CCTTGTTGGAGTGCTCGGTA<br>Reverse primer CAAGGTCTCAACAAAGCCGC  |

|                                        |                                                                              |
|----------------------------------------|------------------------------------------------------------------------------|
| Unigene100648<br><i>WRKY9</i>          | Forward primer GCAACAACCTTGACGGGCAAT<br>Reverse primer CGGTGCAACGATAGTAGGCT  |
| Unigene8314<br><i>WRKY22</i>           | Forward primer CATGTACCCGCCGAGAAGTT<br>Reverse primer CGCTCCACTTGTTTTCTCGC   |
| Unigene35061<br><i>ERF114</i>          | Forward primer AGCTCAACTTCCCCGAAAGG<br>Reverse primer GCATGAGGTCTGCGTAGTGA   |
| Unigene 42955<br><i>ERF1B</i>          | Forward primer GACTAAGGCCAGGCAGTACA<br>Reverse primer CTCTCCACGCCACACTTCA    |
| Unigene119295<br><i>ARF1</i>           | Forward primer ATCTGCATGGAACCGAGTGG<br>Reverse primer GGCATGGAGCTTTGTTGACG   |
| Unigene26596<br><i>ARF6</i>            | Forward primer TGCATTTATGCGTTTCTCGCC<br>Reverse primer GATTTTGGTGACGGACTGCG  |
| Unigene60441<br><i>ARF25</i>           | Forward primer GAGTACTGGTGTGCTTGCT<br>Reverse primer CCCAAGCTTAACGCCACAAC    |
| Unigene152309<br><i>NAC2a</i>          | Forward primer GCATTGAAGAGCTCCCCGAC<br>Reverse primer CTTGCGAGCCTTCTTCTCGT   |
| Unigene42722<br><i>NAC2b</i>           | Forward primer GCTGTTGCTCTTTTTCCGGG<br>Reverse primer CACCCAAAGCCTGTGCGGTAT  |
| Unigene113286<br><i>Trihelix GT-3b</i> | Forward primer GTTGGATGAATTTCCGCCGC<br>Reverse primer ACGAGAACGAAGACAGCGAG   |
| Unigene120810<br><i>bHLH130</i>        | Forward primer CTGGGAGCAGTCCTCCTTTG<br>Reverse primer CAACACCACGAGTGACGGTA   |
| Unigene20461<br><i>bHLH137</i>         | Forward primer TATCCTCCAACGGTGATGGC<br>Reverse primer ACTGGAAAGGCCCTTGTGTT   |
| Unigene137386<br><i>WRKY50</i>         | Forward primer GGACGACGGATATAAGTGGAGG<br>Reverse primer GCTAGGATCCCCCTTTTCCC |
| Unigene131052<br><i>Zinc finger11</i>  | Forward primer TAGACGCCGGACGTTTATCG<br>Reverse primer AAACCTTCCGTACCCAACCC   |
| Unigene121384<br><i>MYB86</i>          | Forward primer ATTCAGGTGCTGGAAGGACG<br>Reverse primer GCCCAGAAGCTCGAACCAAGA  |
| Unigene10919                           | Forward primer CAATGTCGTTCGCCCCGAAAA                                         |



|                              |                                                                               |
|------------------------------|-------------------------------------------------------------------------------|
| <i>GATA4</i>                 | Reverse primer TTTTGTGTACCCGCTGACGA                                           |
| Unigene29962<br><i>CSN4</i>  | Forward primer TGGGCCTTCGTAGCTACTCT<br>Reverse primer GCGGTATTAGACCTCCGAGC    |
| Unigene39089<br><i>PIN6</i>  | Forward primer AGGGGTTGTTCTGGGAGATGA<br>Reverse primer CAAAGTGATGTGCGCAATGGT  |
| Unigene107038<br><i>SKOR</i> | Forward primer ACCGTCATGCTTAGCCTTTGA<br>Reverse primer CGGACCCGAGTTACCTACAGA  |
| Unigene116322<br><i>BADH</i> | Forward primer CACCCTACCATCTACCGCAC<br>Reverse primer AGAAGTTACCAGCCGCATCC    |
| Unigene150235<br><i>CSP1</i> | Forward primer AGTGCTATAACTGCGGCGAG<br>Reverse primer GGCGCAATCTCACACAATCG    |
| Unigene152338<br><i>EF1</i>  | Forward primer CTCCTGCTTTCGATGTTCGC<br>Reverse primer TTGAACACCTTACCGTCGGC    |
| Unigene60515<br><i>PDH</i>   | Forward primer GTGACCAAGGGCTCGTCTAC<br>Reverse primer GCATGCCACAGTTGTTGGAG    |
| <i>AtPIN6</i>                | Forward primer AGTCCTAGAAGGCTCTCGGG<br>Reverse primer TTTGCCAGACTCCCACATC     |
| <i>AtSKOR</i>                | Forward primer TCTCTTCGTTTCCGAGTGGC<br>Reverse primer TTCAGCTGCTCCTTTGCTGT    |
| <i>AtMPK8</i>                | Forward primer ACCAGCTTCTTCGTGGTCTG<br>Reverse primer ATATAGCGGTTGGGGCATCG    |
| <i>AtCSDP</i>                | Forward primer TTCAGAGGATCAATCGGCGG<br>Reverse primer TTCAGAGGATCAATCGGCGG    |
| <i>AtPDH</i>                 | Forward primer AGGTACCATGTGATGCAGGC<br>Reverse primer CAGCTGTAAGACTTGCCCCA    |
| <i>AtERF115</i>              | Forward primer GTGGCTCGGGACATTTGAGA<br>Reverse primer TTGCGGATTAGTCTGCGGAT    |
| <i>AtRD29A</i>               | Forward primer GGATCAAACAGAGGAACCACC<br>Reverse primer CCTCCGATGCTGGAACATTAGT |
| <i>AtNAC2</i>                | Forward primer AATGGCGGCTGCTTCTACAG<br>Reverse primer TCGCCATCATCATAGGACCTG   |

|               |                                                                                |
|---------------|--------------------------------------------------------------------------------|
|               |                                                                                |
| <i>AtHAK5</i> | Forward primer TTATGTCCCTTCATCGGGGC<br>Reverse primer TTCTCTGCCGTAATCTCGGTC    |
| <i>AtHKT1</i> | Forward primer AGTAGACCTCTCTACACTTTCC<br>Reverse primer TTGACCATCATACTCATTGCTG |
| Unigene149995 | Forward primer AAGCGCAGTTCGAGAATCCA<br>Reverse primer ACCTTCCGTTTCGCTGATGT     |
| Unigene115940 | Forward primer AAGAAGTTCAAGCAGCGGGT<br>Reverse primer TGTCTGCAATACCGGACACC     |
| Unigene104256 | Forward primer TTTGAGGTGGGCTGTTGTCC<br>Reverse primer TTTGCTTTTGCTCACCGCAA     |
| Unigene124338 | Forward primer CGCACTCTCGAGAATCGGAA<br>Reverse primer CTTTCTGGGAACGGGCATCT     |
| Unigene28507  | Forward primer TCTGTGCTATCCCACACCCT<br>Reverse primer AAGAGGATGCTCACCCAAGC     |
| Unigene57507  | Forward primer ACACAGTGGAAGCATCAGGG<br>Reverse primer TTTGCTGGGATGGTGCTAGG     |
| Unigene74595  | Forward primer CGAGAGGTTGTTGTTTCCGC<br>Reverse primer GAGGTGCGTGACTTTCAGGA     |
| Unigene87779  | Forward primer GAGGGAAGTGTCCCGTTGAG<br>Reverse primer GACTAATCTCTCCGGCGCTC     |
| Unigene77474  | Forward primer ATCGAGCTGAACACGAACGA<br>Reverse primer GTCAGCACGTCTGCAATTC      |
| Unigene150442 | Forward primer CATTGCCCGTATTGCCTTCG<br>Reverse primer GCCATACTTCTCAACCGCCT     |
| Unigene74868  | Forward primer GCCAAGTTAACCTGCTCCCT<br>Reverse primer CAGTGAAGGGAAGCTTCGGA     |
| Unigene53147  | Forward primer GGCGGTAACCACTTTCTCCA<br>Reverse primer ATCAGTCTCACATCCGCAGC     |
| Unigene152338 | Forward primer CTCCTGCTTTCGATGTCCG<br>Reverse primer TTGAACACCTTACCGTCGGC      |

|               |                                                                             |
|---------------|-----------------------------------------------------------------------------|
| Unigene150420 | Forward primer TGTGGGGATGGTTTGTAGCG<br>Reverse primer AACAGCTTTGACTCCTGGGG  |
| Unigene151507 | Forward primer CGCCGACGTTGAAGCTAAAG<br>Reverse primer GCCGTGACACGAGATAAGGT  |
| Unigene150479 | Forward primer CTCAGCTTTTGTCCGTCCCT<br>Reverse primer CCGATGAACGAGACGACCAT  |
| Unigene10365  | Forward primer CTTGACACCCTCGACAACGA<br>Reverse primer CACCACCTCGACAAGACTCC  |
| Unigene126523 | Forward primer TTTTTGTGTACAGGGCCCCA<br>Reverse primer TGCTACAGCTACCCCTTTTGG |
| Unigene87838  | Forward primer ACGATCCTGAGCAGAGACCT<br>Reverse primer TGACAACCGTCTGTTGGGAG  |
| Unigene129669 | Forward primer AAACCCTTCCATCGGAACCC<br>Reverse primer TGACAAACTCGTCGGTGAGG  |
| Unigene133874 | Forward primer ATTGCTATCCCAGCGAGTGG<br>Reverse primer ACCATTCGTTCCCTAGCAGC  |
| Unigene22932  | Forward primer CGGCCTTTCTCGTCCTGAAT<br>Reverse primer CACCCAATCCGTTTCCCTCA  |
| Unigene6501   | Forward primer GTCACCAGCTGAAGAGGGTC<br>Reverse primer CTTGCCGTTTTGGAAGTGGG  |
| Unigene9466   | Forward primer TGATCTTAGGCTGGCTCCCT<br>Reverse primer CCGACAAGTCCACTCCACAT  |
| Unigene134549 | Forward primer TGATGTCGGTGTGTCTCGTG<br>Reverse primer CGAGTCATCTCGTCAGCAT   |
| Unigene134562 | Forward primer AGCTAGACGTCGAACCGTTG<br>Reverse primer GTATGCGCAAGCTCATCGTC  |
| Unigene134283 | Forward primer TGAGTTCCGTAGATTGGCCG<br>Reverse primer TTCCGTGCTACCGGAAACTG  |
| Unigene134246 | Forward primer AGGTACGAGGTGCGTAGACT<br>Reverse primer CAGGCCATGACTGACCTTGT  |
| Unigene134456 | Forward primer GCCGAGCTCGAGAAGTTGTA                                         |

|                                            |                                                                               |
|--------------------------------------------|-------------------------------------------------------------------------------|
|                                            | Reverse primer ACCTGGTCCATAGTTGCGTC                                           |
| Unigene166335                              | Forward primer AGGTCAGCTGAATCTCGGTG<br>Reverse primer TCCAATCCGACATTTTGGA     |
| Unigene125764                              | Forward primer GTGCTCGACCCCATCTTCAA<br>Reverse primer TAACCTTGAGGAGCGCCTTG    |
| Unigene49875                               | Forward primer CCAGTTCATCACCGCCGATA<br>Reverse primer GTTGGTGTGCTGAATGCTG     |
| Unigene75887                               | Forward primer AGTTGAGAAGACCGCGGAAG<br>Reverse primer ACACGTACACGACCAACCTC    |
| Unigene89776                               | Forward primer TACAGAGATTTGGCCCTGCG<br>Reverse primer TCTGCATCTGCCTACCTCCT    |
| Unigene69183                               | Forward primer AGGACGAGGGTGCAAATCC<br>Reverse primer GTGAGCGGGTAACAAGACGA     |
| Unigene93351                               | Forward primer GTGCCTCTGAACCGACTGAA<br>Reverse primer AGAGCCAAGAACTTGGACGG    |
| Unigene64865                               | Forward primer CTCAGGAAGAAGGATGGGTGCG<br>Reverse primer CAATGGAGGTTGGAGAAGGCT |
| Unigene92785                               | Forward primer CGGCACATACAGACCCCAAT<br>Reverse primer AAGCATCTGCCTGGGGTTTT    |
| Unigene164657                              | Forward primer GGCCAACGGGTGATAAGAGT<br>Reverse primer ACATCGCTCCTGGCAGTTAG    |
| Unigene31992                               | Forward primer CCAAGCACTGACCCATCCAT<br>Reverse primer AAGCGCTTTTAAGGCAGCAC    |
| Unigene74595<br><i>Cationic peroxidase</i> | Forward primer GAGTCCACGGCTGTCTTGAT<br>Reverse primer TAAGACCATGGCCACCACTG    |
| Unigene42955<br><i>ERF1B</i>               | Forward primer GACTAAGGCCAGGCAGTACA<br>Reverse primer CTCTTCCACGCCACACTTCA    |
| Unigene35061<br><i>ERF114</i>              | Forward primer CGCATTCTCGCTTGCTACAC<br>Reverse primer GGATCCACCGTGTCTGACTG    |
| Unigene152117<br><i>Hexokinase</i>         | Forward primer CCAAGCTCTTCATCTGCCGT<br>Reverse primer CCCACCAAGAAAAGCAAACCA   |

|                                    |                                                                                 |
|------------------------------------|---------------------------------------------------------------------------------|
| Unigene113286<br><i>Trihelix</i>   | Forward primer CCCCCTCCTCAATCCTCTCT<br>Reverse primer GACCTGCTGTCTGGTCTTGT      |
| Unigene150075<br><i>14-3-3</i>     | Forward primer AGTTCAGTGCAAGACCGAGG<br>Reverse primer GTTGGTGACAAGCGCAAGAC      |
| Unigene3470<br><i>VHA-C</i>        | Forward primer GCGATATGGTCTGCCTCCAT<br>Reverse primer AGCGACACTACACTGCCAAA      |
| Unigene29379<br><i>VPP</i>         | Forward primer GAGCTTGACCTTGGACACGA<br>Reverse primer CCCGACTTCACGGCTATCTG      |
| Unigene69535<br><i>CBL</i>         | Forward primer ATGTCTCCACTTGGCTCACG<br>Reverse primer TTCTTCCGCCAATCGGTCAA      |
| Unigene51908<br><i>NHX2</i>        | Forward primer AACGGTCTCTTCAGACGCAAT<br>Reverse primer TGTCTACCTTCACGAGGTTCG    |
| Unigene115806<br><i>NHX6</i>       | Forward primer GACGCCCTACTTGCACAAATC<br>Reverse primer TGCTGCATCGTTTACTGAATTTGA |
| Unigene123012<br><i>CIPK</i>       | Forward primer TGGCAGAAGCTACCAAGTGT<br>Reverse primer CCTCGGGACGGAATCTTCTT      |
| Unigene151915<br><i>Calmodulin</i> | Forward primer GCTTTTCTGTCCTGACCGCC<br>Reverse primer AGGCCTCCTTAAACTCGGAGA     |
